# Supplementary material
Source: publisher figshare collection journal article supplement (https://acs.figshare.com/ndownloader/files/4523200)
Supplement: Supplementary file 1 [file 4523200]

# ***anti*-Selective Catalytic Asymmetric Nitroaldol Reaction via a Heterobimetallic Heterogeneous Catalyst**

Tatsuya Nitabaru,<sup>1</sup> Akihiro Nojiri,<sup>†</sup> Makoto Kobayashi,<sup>2</sup> Naoya Kumagai,<sup>†,\*</sup> and Masakatsu Shibasaki<sup>†,\*</sup>

*Graduate School of Pharmaceutical Sciences, The University of Tokyo, 7-3-1 Hongo, Bunkyo-ku, Tokyo 113-0033, Japan, and Process Chemistry, R&D, Kissei Pharmaceutical Company, Ltd., 197-5 Kamiyoshi, Kubiki-ku, Joetsu, Niigata 942-0145, Japan*

mshibasa@mol.f.u-tokyo.ac.jp, nkumagai@mol.f.u-tokyo.ac.jp

## *Supporting Information*

1. General
  - 1-1. General procedures
  - 1-2. Materials
  - 1-3. Instrumentation
2. Experimental Procedure and Characterization
  - 2-1. Representative procedure for *anti*-selective catalytic asymmetric nitroaldol reaction (for Table 2, entry 12)
  - 2-2. Representative procedure for *anti*-selective catalytic asymmetric nitroaldol reaction with supernatant and precipitates (for Scheme 1)
  - 2-3. Representative procedure for *anti*-selective catalytic asymmetric nitroaldol reaction with heterogeneous heterobimetallic catalyst (for Table 5, entry 1)
  - 2-4. Large-scale demonstration of *anti*-selective catalytic asymmetric nitroaldol reaction of **2c** and **3a** (for Scheme 6)
  - 2-5. Characterization of nitroaldol products
3. Synthesis of Ligand **1**
4. ICP Analysis of Nd/**1m**/Na and Sm/**1m**/Na Heterobimetallic Catalyst
5. XRF Analysis of Nd/**1m**/Na Heterobimetallic Catalyst
6. ESI TOF MS Analysis of the Nd/**1m**/Na Heterobimetallic Catalyst
7. Conformational Analysis of Ligand **1g** and **1h**
8. Storage of the Heterogeneous Heterobimetallic Catalyst
9. References
10. NMR Spectra (separated file)

## **1. General**

### **1-1. General procedures.**

Reactions were performed in flame-dried 20 mL test tubes with a magnetic stirring bar unless otherwise noted. The test tubes were fitted with a glass 3-way stopcock and reactions were conducted under argon atmosphere. Air- and moisture-sensitive liquids were transferred via gas-tight syringe and stainless-steel needle. Flash chromatography was performed using silica gel 60 (230-400 mesh) purchased from Merck.

### **1-2. Materials.**

Commercial reagents were purchased from, Kojundo Chemical Co Ltd. (RE(O<sup>*i*</sup>Pr)<sub>3</sub>, RE<sub>5</sub>O(O<sup>*i*</sup>Pr)<sub>13</sub>; stored and handled in a dry box, contact: <http://www.kojundo.co.jp/English/index.html>, Fax: +81-49-284-1351, e-mail: sales@kojundo.co.jp.), TCI (aldehydes, nitroethane, nitropropane, nitroethanol), Wako Pure Chemical Co. Ltd. (aldehydes), and Aldrich (NaHMDS (1.0 M/THF)). Aldehydes were purified by distillation or recrystallization. THF was distilled from sodium/benzophenone ketyl or used as received from KANTO Chemical Co. Ltd. (anhydrous).

---

<sup>1</sup> The University of Tokyo.

<sup>2</sup> Kissei Pharmaceutical Company, Ltd.

### 1-3. Instrumentation.

$^1\text{H}$ ,  $^{13}\text{C}$ , and  $^{19}\text{F}$  NMR spectra were recorded on JEOL LA-500 or ECX-500 spectrometers (500 MHz). Chemical shifts for protons are reported in parts per million downfield from tetramethylsilane and are referenced to residual protium in the NMR solvent ( $\text{CDCl}_3$ :  $\delta$  7.26 ppm,  $\text{CD}_3\text{OD}$ :  $\delta$  3.31 ppm). Chemical shifts for carbons are reported in parts per million downfield from tetramethylsilane and are referenced to the carbon resonances of the solvent ( $\text{CDCl}_3$ :  $\delta$  77.0). Chemical shifts for fluorines are reported in the scale relative to  $\text{CF}_3\text{COOH}$  ( $-79.0$  ppm) as an external reference. Coupling constants are reported in Hertz (Hz). Infrared (IR) spectra were obtained using a JASCO FT/IR 410 spectrophotometer. Melting points were determined on an open capillary apparatus. Optical rotation was measured using a 1 mL cell with a 0.5 dm path length on a JASCO polarimeter P-1010. ESI mass spectral data for new compounds were obtained using a Waters ZQ-4000 mass spectrometer. High-resolution mass spectra (FAB) were obtained using a JEOL JMS-MS700V mass spectrometer. ESI TOF MS spectra of the catalyst was obtained using JEOL Accu TOF JMS T100-LP. ICP analysis of the heterobimetallic catalyst was conducted with Shimadzu ICPS-7510. WDXRF analysis of the heterobimetallic catalyst was conducted with Rigaku ZSX Primus II.

## 2. Experimental Procedure and Characterization

### 2-1. Representative procedure for *anti*-selective catalytic asymmetric nitroaldol reaction (for Table 2, entry 12).

To a flame dried test tube (20 mL) equipped with a magnetic stirring bar and 3-way glass stopcock was charged ligand **1b** (5.9 mg, 0.018 mmol) and dried under vacuum at room temperature for 30 min. Ar was backfilled to the test tube, then THF (200  $\mu\text{L}$ ) and  $\text{Nd}(\text{O}^i\text{Pr})_3$  (45  $\mu\text{L}$ , 0.009 mmol, 0.2 M/THF, transferred by well-dried syringe and needle) were successively added at room temperature. After stirring the resulting solution at the same temperature for 1 h, the mixture was cooled to 0  $^\circ\text{C}$  and NaHMDS (18  $\mu\text{L}$ , 0.018 mmol, 1.0 M/THF, purchased from Aldrich and stored in pear-shaped flask with tight glass 3-way stopcock, transferred by well-dried syringe and needle) was added dropwise at the same temperature. After stirring the resulting mixture at room temperature for 30 min (white precipitate appeared), nitroethane (**3a**) (72  $\mu\text{L}$ , 1.0 mmol) (clear solution developed), and  $\text{H}_2\text{O}$  (45  $\mu\text{L}$ , 0.009 mmol, 0.2 M/THF) were successively added and the resulting solution (or suspension) was stirred for 1 h at the same temperature (gradually became white suspension). The mixture was diluted with THF (100  $\mu\text{L}$ ) and cooled to  $-40$   $^\circ\text{C}$ , then benzaldehyde (**2a**) (10  $\mu\text{L}$ , 0.10 mmol) was added dropwise. After stirring at the same temperature for 20 h, 1N HCl aq. was added and the resulting mixture was extracted with diethyl ether (x2). The organic layer was washed with sat. aq.  $\text{NaHCO}_3$  and brine, then dried over  $\text{Na}_2\text{SO}_4$ . After removal of the organic solvent under reduced pressure, the resulting residue was analyzed by  $^1\text{H}$  NMR to determine chemical yield (99%, 1,4-dioxane (3.71 ppm) as an internal standard) and diastereomeric ratio (*anti*/*syn* = 40/1,  $\text{PhCH}(\text{OH})-$ : *anti* = 5.39 ppm (major), *syn* = 5.01 ppm (minor)) of **4aa**. The relative configuration was determined by comparison with the reported chemical shift values in the literature (ref 9 in maintext). Enantiomeric excess was determined by HPLC analysis (*anti* = 84% ee, DAICEL CHIRALPAK AD-H ( $\phi$ 0.46 cm x 25 cm), 2-propanol/*n*-hexane 1/9, flow rate 1.0 mL/min, detection at 254 nm,  $t_R$  8.0 min (*anti* minor-enantiomer: (1*S*,2*R*)) and 8.8 min (*anti* major-enantiomer: (1*R*,2*S*))).

### 2-2. Representative procedure for *anti*-selective catalytic asymmetric nitroaldol reaction with supernatant and precipitates (for Scheme 1).

To a flame dried glass tube (inner diameter 5 mm, length 10 cm, capped with rubber septum) was added ligand **1m** (6.8 mg, 0.018 mmol) and dried under vacuum at room temperature for 10 min. To the test tube was back-filled Ar, then THF (200 mL) and  $\text{Nd}_5\text{O}(\text{O}^i\text{Pr})_{13}$  (45  $\mu\text{L}$ , 0.009 mmol, 0.2 M/THF (based on Nd), transferred by well-dried syringe and needle) were successively added at room temperature. After agitation of the resulting mixture with vortex mixer at the same temperature for 30 sec, the mixture was cooled to 0  $^\circ\text{C}$  and NaHMDS (18  $\mu\text{L}$ , 0.018 mmol, 1.0 M/THF, purchased from Aldrich and stored in pear-shaped flask with tight glass 3-way stopcock, transferred by well-dried syringe and needle) was added at the same temperature to give white suspension. After agitation of the resulting mixture with vortex mixer at room temperature for 30 sec, nitroethane (**3a**) (60  $\mu\text{L}$ ), was added at the same temperature to give a clear solution. After standing at the same temperature, the white precipitates appeared and the whole suspension was transferred to Eppendorf safe-lock tube (size 1.5 mL). The tube was centrifuged (ca.  $10^4$  rpm, 30 sec). The supernatant was decanted to the flame-dried test tube dried test tube **A** and dry THF (1.0 mL) was added to the precipitate. The tube was agitated by vortex mixer for 30 sec and centrifuged again (washing process). The supernatant was decanted (discarded). The resulting precipitate was agitated with dry THF (1200  $\mu\text{L}$ ) and the resulting suspension was transferred to a flame-dried test tube **B** filled with nitroethane (**3a**) (215  $\mu\text{L}$ , 3.0 mmol) via gas-tight syringe. The mixture was cooled to  $-40$   $^\circ\text{C}$ , then benzaldehyde (**2a**) (30.5  $\mu\text{L}$ , 0.30 mmol) was added dropwise. After stirring the reaction mixture at the same temperature for 20 h, 1N HCl aq. was added and the resulting mixture was extracted with diethyl ether (x2). The combined organic layers were washed with sat. aq.  $\text{NaHCO}_3$  and brine, then dried over  $\text{Na}_2\text{SO}_4$ . After removal of volatiles under reduced pressure, the resulting residue was analyzed by  $^1\text{H}$  NMR to determine chemical yield (96%,

1,4-dioxane (3.71 ppm) as an internal standard) and diastereomeric ratio (*anti/syn* = >40/1) of **4aa**. Enantiomeric excess was determined by HPLC analysis (*anti* = 94% ee, DAICEL CHIRALPAK AD-H ( $\phi$  0.46 cm x 25 cm), 2-propanol/*n*-hexane 1/9, flow rate 1.0 mL/min, detection at 254 nm,  $t_R$  8.0 min (*anti* minor-enantiomer: (1*S*,2*R*)) and 8.8 min (*anti* major-enantiomer: (1*R*,2*S*))).

The reaction was run by adding **2a** (30.5  $\mu$ L, 0.30 mmol) and **3a** (215  $\mu$ L, 3.0 mmol) in test tube **A** (supernatant) under the identical conditions as test tube **B** (precipitates), affording **4aa** (21% yield, *anti/syn* = 6.5/1, *anti* = 62% ee).

### 2-3. Representative procedure for *anti*-selective catalytic asymmetric nitroaldol reaction with heterogeneous heterobimetallic catalyst (for Table 5, entry 1).

To a flame dried glass tube (inner diameter 5 mm, length 10 cm, capped with rubber septum) was added ligand **1m** (6.8 mg, 0.018 mmol) and dried under vacuum at room temperature for 10 min. To the test tube was back-filled Ar, then THF (200 mL) and Nd<sub>5</sub>O(O<sup>*i*</sup>Pr)<sub>13</sub> (45  $\mu$ L, 0.009 mmol, 0.2 M/THF (based on Nd), transferred by well-dried syringe and needle) were successively added at room temperature. After agitation of the resulting mixture with vortex mixer at the same temperature for 30 sec, the mixture was cooled to 0 °C and NaHMDS (18  $\mu$ L, 0.018 mmol, 1.0 M/THF, purchased from Aldrich and stored in pear-shaped flask with tight glass 3-way stopcock, transferred by well-dried syringe and needle) was added at the same temperature to give white suspension. After agitation of the resulting mixture with vortex mixer at room temperature for 30 sec, nitroethane (**3a**) (60  $\mu$ L), was added at the same temperature to give a clear solution. After standing at the same temperature, the white precipitates appeared and the whole suspension was transferred to Eppendorf safe-lock tube (size 1.5 mL). The tube was centrifuged (ca. 10<sup>4</sup> rpm, 30 sec). The supernatant was decanted and dry THF (1.0 mL) was added to the precipitate. The tube was agitated by vortex mixer for 30 sec and centrifuged again (washing process). The supernatant was decanted (discarded). The resulting precipitates were agitated with dry THF (1200  $\mu$ L) and the resulting suspension was transferred to a flame-dried test tube filled with nitroethane (**3a**) (215  $\mu$ L, 3.0 mmol) via gas-tight syringe. The mixture was cooled to -40 °C, then benzaldehyde (**2a**) (30.5  $\mu$ L, 0.30 mmol) was added dropwise. After stirring the reaction mixture at the same temperature for 20 h, 1N HCl aq. was added and the resulting mixture was extracted with diethyl ether (x2). The combined organic layers were washed with sat. aq. NaHCO<sub>3</sub> and brine, then dried over Na<sub>2</sub>SO<sub>4</sub>. After removal of volatiles under reduced pressure, the residue was purified by flash silica gel column chromatography (SiO<sub>2</sub>, hexane/ethyl acetate = 10/1) to give the desired product **4aa** as a colorless oil (54.1 mg, 99% yield). Enantiomeric excess was determined by HPLC analysis (*anti* = 92% ee, DAICEL CHIRALPAK AD-H ( $\phi$  0.46 cm x 25 cm), 2-propanol/*n*-hexane 1/9, flow rate 1.0 mL/min, detection at 254 nm,  $t_R$  8.0 min (*anti* minor-enantiomer: (1*S*,2*R*)) and 8.8 min (*anti* major-enantiomer: (1*R*,2*S*))).

### 2-4. Large-scale demonstration of *anti*-selective nitroaldol reaction of **2c** and **3a** (for Scheme 6).

To a flame-dried 30 mL pear-shaped flask was charged Nd<sub>5</sub>O(O<sup>*i*</sup>Pr)<sub>13</sub> (1.11 g, 0.738 mmol, 3.69 mmol based on Nd) in a dry box, and dried under vacuum for 1 h at room temperature. Ar was back-filled and cooled to 0 °C. To the flask was added THF (18.4 mL, distilled from sodium-benzophenone ketyl) to give 0.2 M (based on Nd)/THF solution. The solution was stirred at 0 °C for 1 h and at room temperature for 1 h, then left stand overnight.

To a flame-dried 100 mL pear-shaped flask were added ligand **1m** (1.78 g, 4.71 mmol), THF (21.0 mL, dehydrated, Kanto Chemical Co. Ltd, used as received), and 0.2 M Nd<sub>5</sub>O(O<sup>*i*</sup>Pr)<sub>13</sub> (based on Nd) in THF (11.8 mL, 2.36 mmol) at room temperature under Ar. After cooling the resulting mixture to 0 °C, NaHMDS (1.0 M/THF, 4.12 mL, 4.12 mmol, Aldrich, used as received) was added to give white suspension, which was warmed to room temperature. To the suspension was added nitroethane (**3a**) (10.5 g, 140 mmol) and clear solution developed, which turned to white suspension again within 10 min. The suspension was stirred at room temperature for 1 h and left stand for 2 h. Centrifugation (ca. 10<sup>3</sup> rpm, 5 min) of the suspension and decantation of the supernatant gave the white precipitates, to which was added THF and the resulting suspension was agitated with a vortex mixer, then centrifuged again. The supernatant was decanted and the resulting precipitates were agitated with THF (40 mL, dehydrated, Kanto Chemical Co. Ltd, used as received) to give catalyst suspension.

To a oven-dried (120 °C) 3-necked 5 L round-bottom flask equipped with a overhead mechanical stirrer, a digital thermometer and a three-way glass stopcock were charged **2c** (50 g, 235.6 mmol) and dried under vacuum, then back-filled with Ar. To the flask were added THF (850 mL, dehydrated, Kanto Chemical Co. Ltd, used as received), nitroethane (**3a**) (177 g, 2360 mmol, WAKO pure chemical, used as received), and the flask was immersed to cooling bath adjusted at -30 °C (medium: 2-propanol). After cooling the solution to -30.7 °C, the heterogeneous Nd/Na heterobimetallic catalyst (suspension in THF 40 g, 10g rinse) was transferred to the flask dropwise (8 min) via syringe. Upon addition of the catalyst, the internal temperature raised to -27.6 °C. The resulting white suspension was stirred for 24 h, the range of internal temperature was -24.5 ~ -34.7 °C. The reaction was quenched with 1N HCl (23.5 mL) at the same temperature, the gradually warmed to room temperature. Ethyl acetate (500 g) and 10% NaCl aq. (150 g) were added, and the organic layer was separated. Aqueous layer was extracted with ethyl acetate (150 g). The combined

organic layers were washed with sat.  $\text{NaHCO}_3$  aq. (200 g), 10%  $\text{NaCl}$  aq. (150 g), and brine (150 g), then dried over  $\text{Na}_2\text{SO}_4$  for 1 h. After filtration, volatiles were removed under reduced pressure and the resulting residue was analyzed by  $^1\text{H}$  NMR to determine conversion (85%, determined by integration value of **4ea/2e**) and diastereomeric ratio (*anti/syn* = >40/1,  $-\text{C}(\text{NO}_2)\text{CH}_3$ : *anti* = 1.52 ppm (major), *syn* = 1.30 ppm (minor)) of **4ea**. The relative configuration was determined by comparison with the reported chemical shift values in the literature (ref 10b in maintext). Small aliquot of the residue was purified by preparative thin-layer chromatography and submitted to HPLC analysis for the determination of enantiomeric excess (*anti* = 96.6% ee, DAICEL CHIRALPAK AS-H ( $\phi$  0.46 cm x 25 cm), 2-propanol/*n*-hexane 1/9, flow rate 1.0 mL/min, detection at 254 nm,  $t_R$  29.3 min (*anti* minor-enantiomer: (1*S*,2*R*)) and 35.0 min (*anti* major-enantiomer: (1*R*,2*S*))). To the residue was added ethyl acetate (200 g) and the resulting solution was evaporated at 50 °C under reduced pressure. The residue was re-dissolved with ethyl acetate (100 g). To the solution was added *n*-heptane (250 g) dropwise with gentle stirring (solid material appeared when ca. 100g of *n*-heptane was added). After stirring for 1 h, additional *n*-heptane (1050 g) was added dropwise over 1 h and the resulting suspension was left stand at room temperature for 5 h then at 0 °C for 2 h. The solid material was collected by filtration and washed with ice-cold ethyl acetate/*n*-heptane = 1/13 mixed solvent (140 g x 2), then dried at 35 °C for 8 h under vacuum to give pure **4ca** as a white solid (75.7 g, 51.3 mmol, 76% yield).

## 2-5. Characterization of nitroaldol products

**4aa**, **4ba**, **4ca**, **4ea**, **4fa**, **4ia**, **4ja**, **4ka**, **4la**, **4ma**, **4ab** are reported compounds [(a) Ooi, T.; Doda, K.; Maruoka, K. *J. Am. Chem. Soc.* **2003**, 125, 2054. (b) Risgaard, T.; Gothelf, K. V.; Jørgensen, K. A. *Org. Biomol. Chem.* **2003**, 1, 153. (c) Gruber-Khadjawi, M.; Purkarthofer, T.; Skrane, W.; Griengle, H. *Adv. Synth. Catal.* **2007**, 349, 1445. (d) Uraguchi, D.; Sakaki, S.; Ooi, T. *J. Am. Chem. Soc.* **2007**, 129, 12392. (e) Nitabaru, T.; Kumagai, N.; Shibasaki, M. *Tetrahedron Lett.* **2008**, 49, 272. (f) Handa, S.; Nagawa, K.; Sohtome, Y.; Matsunaga, S.; Shibasaki, M. *Angew. Chem., Int. Ed.* **2008**, 47, 3230]. Relative and absolute configurations of these nitroaldol products were determined by comparing chemical shifts in  $^1\text{H}$  NMR and reported retention times in HPLC analysis. The relative configuration of the new products was determined by NOE analysis after conversion to the corresponding cyclic carbamates. The absolute configuration of the new products was determined by analogy.

### (1*R*,2*S*)-2-Nitro-1-phenylpropan-1-ol (**4aa**) (**4ba**)

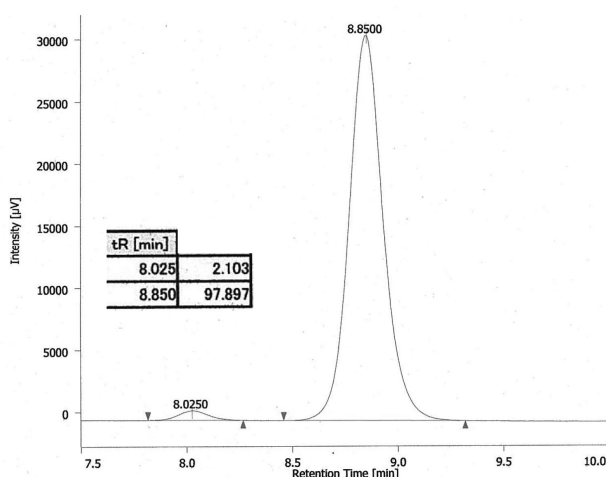

CHIRALPAK AD-H ( $\phi$  0.46 cm x 25 cm)  
2-propanol/*n*-hexane = 1/9, flow rate 1.0 mL/min  
detection 254 nm

### (1*R*,2*S*)-1-(2,4-Dimethylphenyl)-2-nitropropan-1-ol

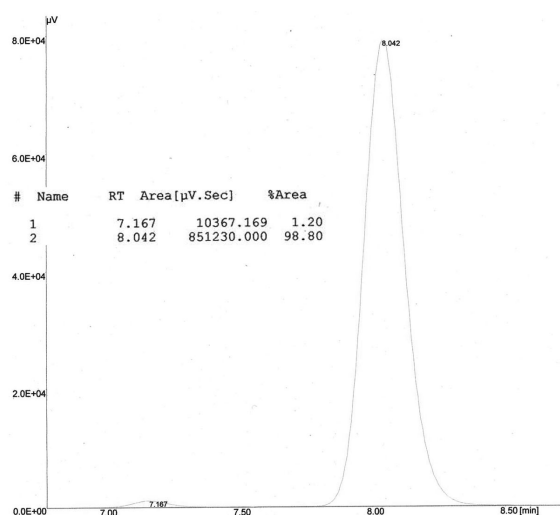

CHIRALPAK AD-H ( $\phi$  0.46 cm x 25 cm)  
2-propanol/*n*-hexane = 1/9, flow rate 1.0 mL/min  
detection 254 nm

**(1R,2S)-1-(4-(Benzyloxy)phenyl)-2-nitropropan-1-ol (4ca)**

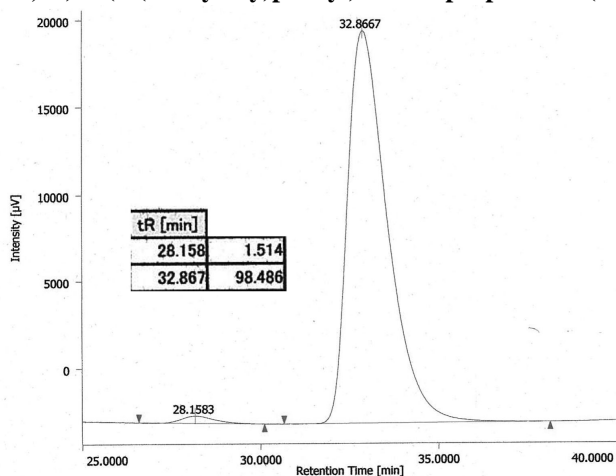

CHIRALPAK AD-H ( $\phi$  0.46 cm x 25 cm)

2-propanol/*n*-hexane = 1/9, flow rate 1.0 mL/min

detection 254 nm

**(1R,2S)-1-(4-Bromophenyl)-2-nitro-1-propanol (4da)**

Colorless solid; IR (KBr)  $\nu$  3521, 2912, 1547  $\text{cm}^{-1}$ ; m.p. 83-84 °C;  $^1\text{H}$  NMR ( $\text{CDCl}_3$ )  $\delta$  1.47 (d,  $J$  = 6.7 Hz, 3H), 2.77-2.81 (m, 1H), 4.63 (dq,  $J$  = 3.7, 7.1 Hz, 1H), 5.33-5.36 (m, 1H), 7.24 (d,  $J$  = 8.5 Hz, 2H), 7.50 (d,  $J$  = 8.5 Hz, 2H);  $^{13}\text{C}$  NMR ( $\text{CDCl}_3$ )  $\delta$  12.0, 73.2, 87.1, 122.5, 127.7, 131.9, 137.4;  $[\alpha]_D^{24}$  -1.7 ( $c$  0.81,  $\text{CHCl}_3$ , 94% ee sample); ESI-MS  $m/z$  282  $[\text{M}+\text{Na}]^+$ ; HRMS (FAB) Anal. calcd. for  $\text{C}_9\text{H}_{10}\text{N}_1\text{O}_3\text{BrCs}$   $m/z$  391.8898  $[\text{M}+\text{Cs}]^+$ , found 391.8894; CHIRALPAK AD-H ( $\phi$  0.46 cm x 25 cm), 2-propanol/*n*-hexane = 1/9, flow rate 1.0 mL/min, detection 210 nm,  $t_R$  = 9.6 min (minor), 10.6 min (major). Relative configuration was determined after conversion to the corresponding carbamate.

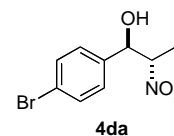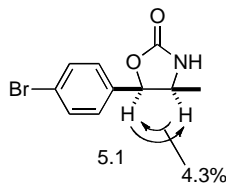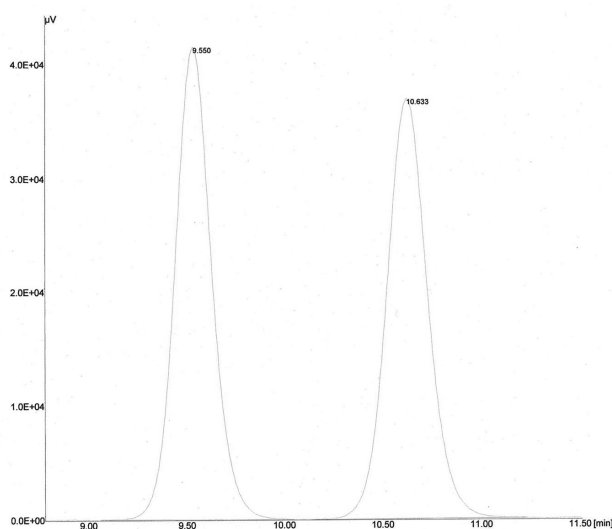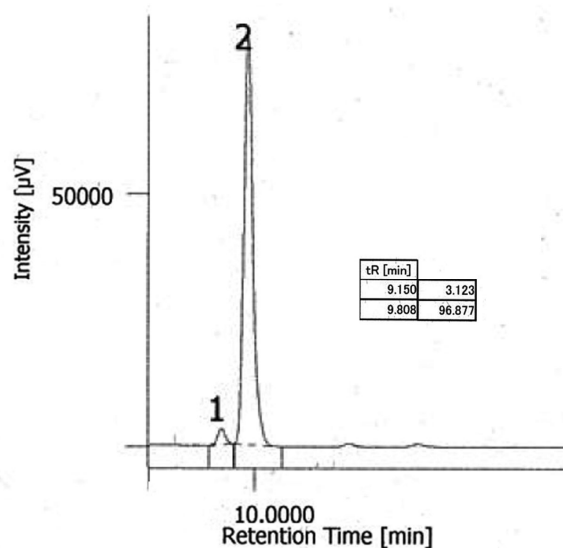

**(1R,2S)-1-(4-Fluorophenyl)-2-nitropropan-1-ol (4ea)**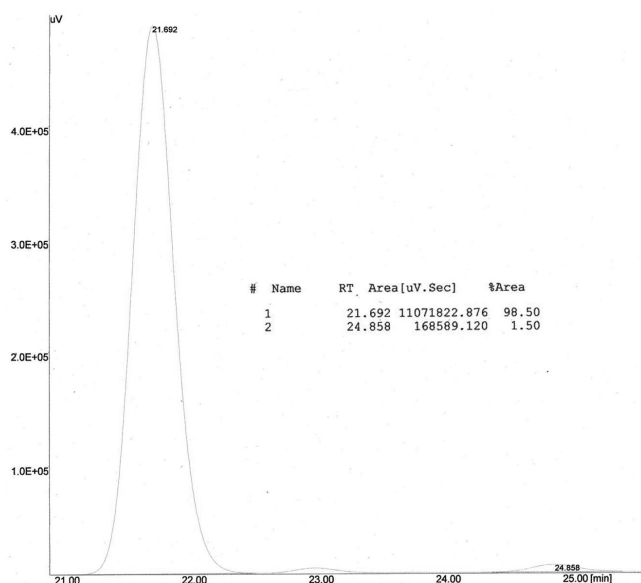

CHIRALPAK AD-H ( $\phi$  0.46 cm x 25 cm)  
 2-propanol/EtOH/*n*-hexane = 1/2.3/30, flow rate 0.5 mL/min  
 detection 220 nm

**(1R,2S)-2-Nitro-1-(4-nitrophenyl)propan-1-ol (4fa)**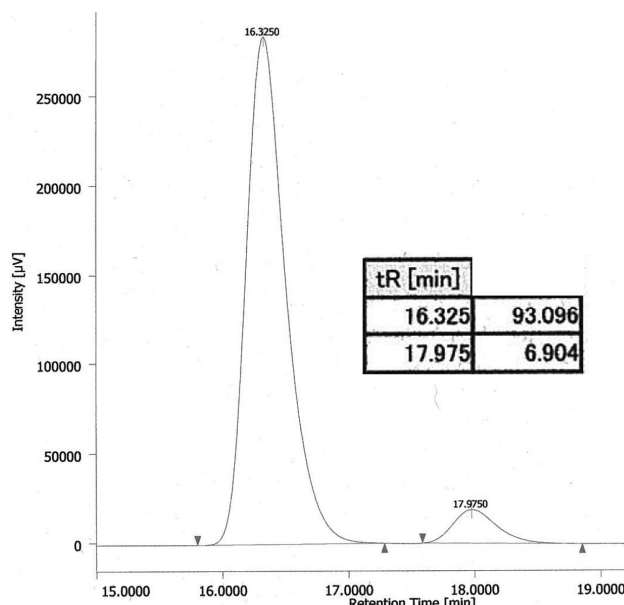

CHIRALPAK AD-H ( $\phi$  0.46 cm x 25 cm)  
 + CHIRALPAK OD-H ( $\phi$  0.46 cm x 25 cm)  
 2-propanol/*n*-hexane = 1/4, flow rate 1.0 mL/min  
 detection 254 nm

**4-((1R,2S)-1-Hydroxy-2-nitropropyl)benzonitrile (4ga)**

Colorless solid; IR (KBr)  $\nu$  3449, 2234, 1551  $\text{cm}^{-1}$ ; m.p. 99-100  $^{\circ}\text{C}$ ;  $^1\text{H}$  NMR ( $\text{CDCl}_3$ )  $\delta$  1.47 (d,  $J$  = 6.9 Hz, 3H), 3.06 (d,  $J$  = 3.4 Hz, 1H), 4.68 (dq,  $J$  = 3.5, 6.9 Hz, 1H), 5.49 (s, 1H), 7.53 (d,  $J$  = 8.6 Hz, 2H), 7.69 (d,  $J$  = 8.6 Hz, 2H);  $^{13}\text{C}$  NMR ( $\text{CDCl}_3$ )  $\delta$  11.9, 73.0, 86.8, 112.4, 118.3, 126.8, 132.5, 143.7;  $[\alpha]_D^{29}$  -2.6 ( $c$  0.94,  $\text{CHCl}_3$ , 90% ee sample (ee has been changed by separation of diastereomers by preparative chiral HPLC)); ESI-MS  $m/z$  229  $[\text{M}+\text{Na}]^+$ ; HRMS (FAB) Anal. calcd. for  $\text{C}_{10}\text{H}_{10}\text{N}_2\text{O}_3$   $m/z$  338.9746  $[\text{M}+\text{Cs}]^+$ , found 338.9754; CHIRALPAK AS-H ( $\phi$  0.46 cm x 25 cm), 2-propanol/*n*-hexane = 1/9, flow rate 1.0 mL/min, detection 254 nm,  $t_R$  = 32.6 min (minor), 35.5 min (major).

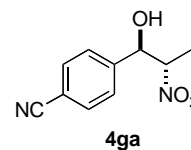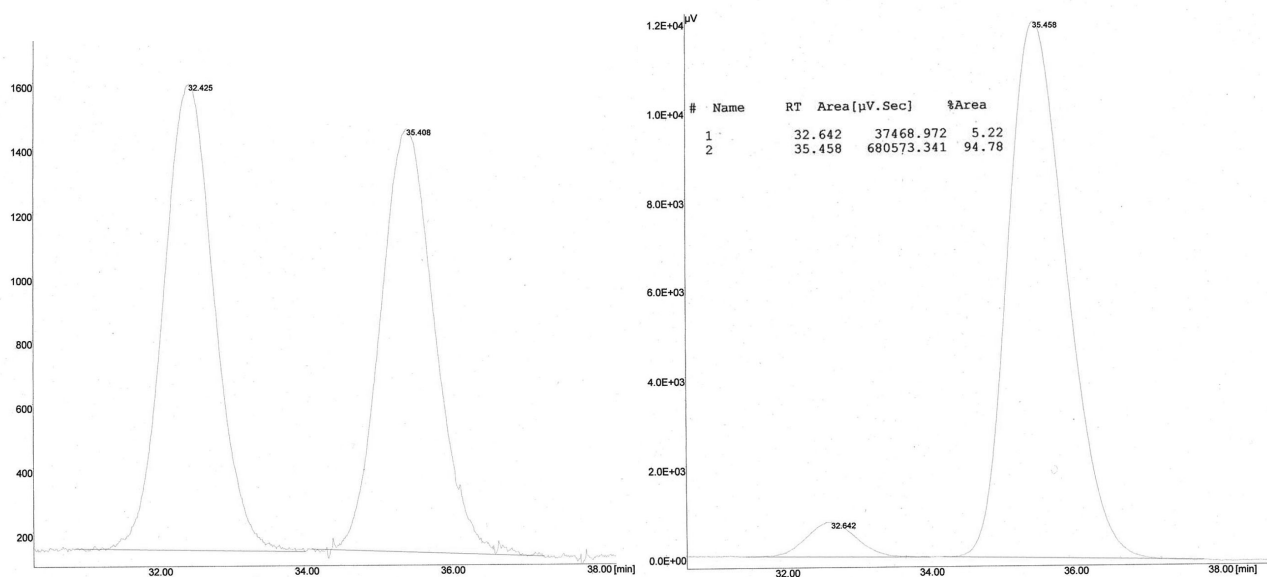

**(1R,2S)-1-(4-Methoxycarbonylphenyl)-2-nitro-1-propanol (4ha)**

Colorless oil; IR (neat)  $\nu$  3468, 1718, 1701, 1619  $\text{cm}^{-1}$ ;  $^1\text{H}$  NMR ( $\text{CDCl}_3$ )  $\delta$  1.46 (d,  $J = 7.0$  Hz, 3H), 2.86 (d,  $J = 3.7$  Hz, 1H), 3.90 (s, 3H), 4.69 (dq,  $J = 3.4, 7.0$  Hz, 1H), 5.47 (dd,  $J = 3.4, 3.7$  Hz, 1H), 7.45 (d,  $J = 8.2$  Hz, 2H), 8.03 (d,  $J = 8.2$  Hz, 2H);  $^{13}\text{C}$  NMR ( $\text{CDCl}_3$ )  $\delta$  11.8, 52.3, 73.4, 87.0, 126.0, 130.0, 130.3, 143.3, 166.6;  $[\alpha]_{\text{D}}^{26} -0.6$  ( $c$  0.37,  $\text{CHCl}_3$ , 89% ee sample); ESI-MS  $m/z$  262  $[\text{M}+\text{Na}]^+$ ; HRMS (FAB) Anal. calcd. for  $\text{C}_{11}\text{H}_{13}\text{NO}_5$   $m/z$  371.9848  $[\text{M}+\text{Cs}]^+$ , found 371.9837; CHIRALPAK AS-H ( $\phi$  0.46 cm x 25 cm), 2-propanol/*n*-hexane = 1/9, flow rate 1.0 mL/min, detection 254 nm,  $t_{\text{R}} = 27.5$  min (minor), 31.3 min (major).

Relative configuration was determined after conversion to the corresponding carbamate.

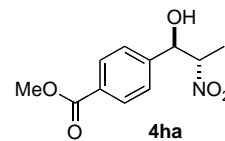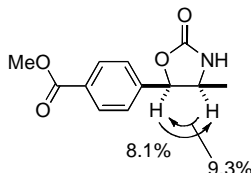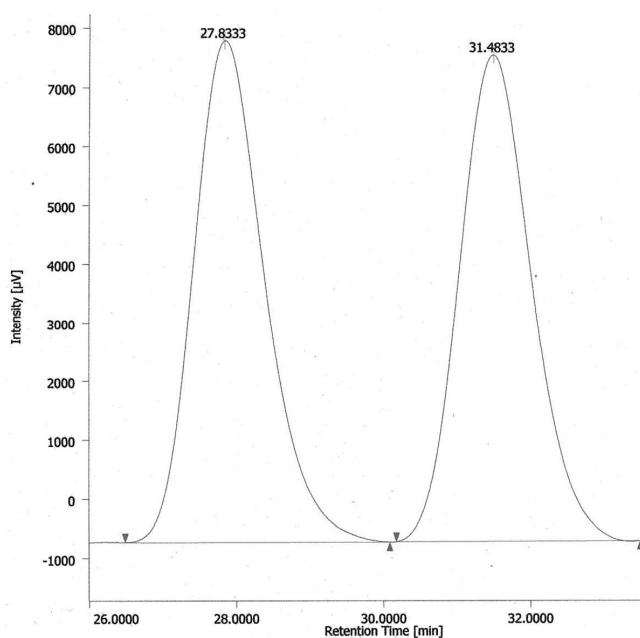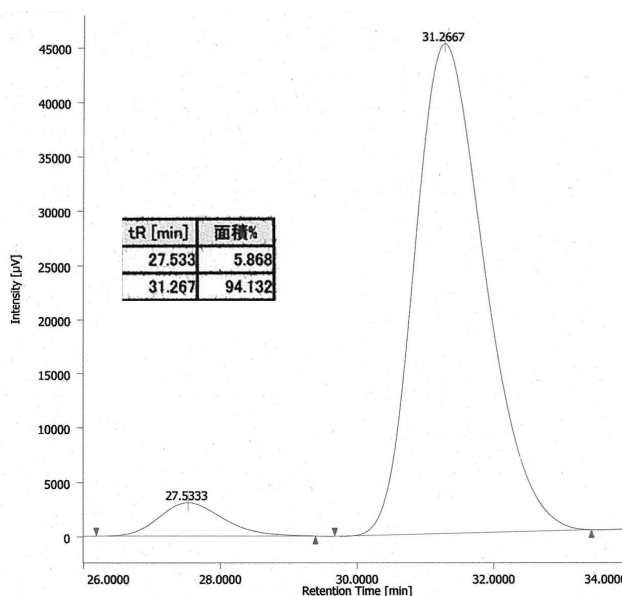**(1S,2S)-1-(Furan-2-yl)-2-nitropropan-1-ol (4ia)**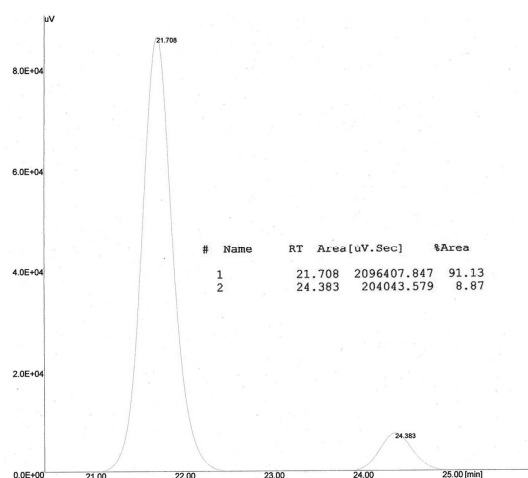

CHIRALPAK AD-H ( $\phi$  0.46 cm x 25 cm)

**(3R,4S,E)-4-Nitro-1-phenylpent-1-en-3-ol (4ja)**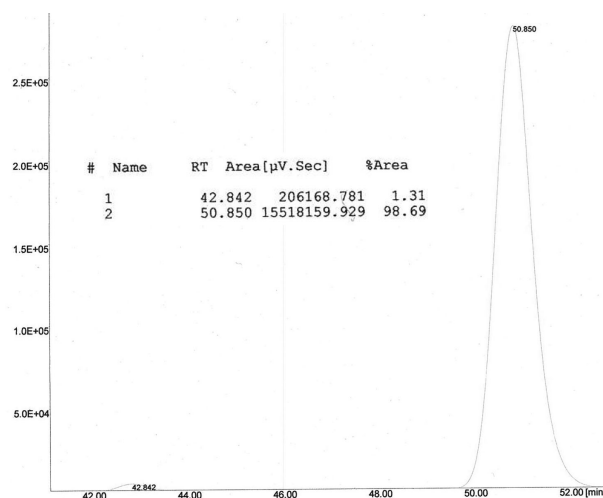

CHIRALPAK AD-H ( $\phi$  0.46 cm x 25 cm)

2-propanol/EtOH/*n*-hexane = 1/1/18, flow rate 0.5 mL/min  
detection 254 nm

**(3*R*,4*S*)-4-Nitro-1-phenylpentan-3-ol (4ka)**

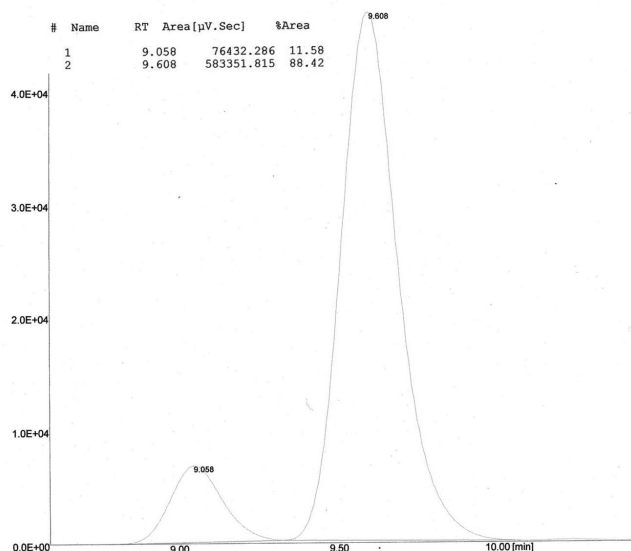

CHIRALPAK AD-H ( $\phi$  0.46 cm x 25 cm)  
2-propanol/*n*-hexane = 1/9, flow rate 1.0 mL/min  
detection 254 nm

2-propanol/*n*-hexane = 1/20, flow rate 0.5 mL/min  
detection 254 nm

**(1*R*,2*S*)-1-Cyclohexyl-2-nitropropan-1-ol (4la)**

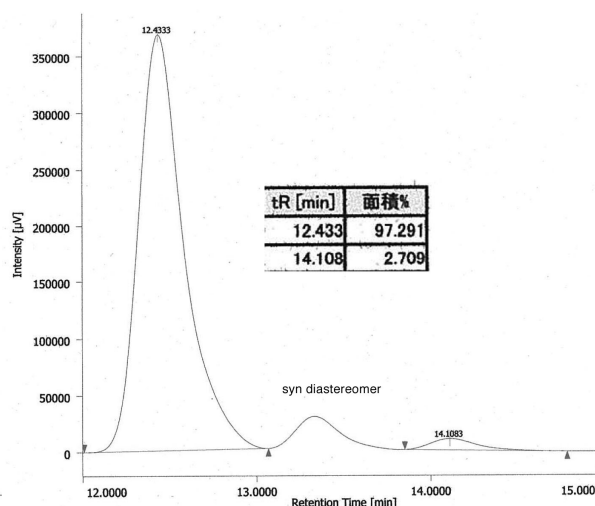

CHIRALPAK AD-H ( $\phi$  0.46 cm x 25 cm)  
2-propanol/*n*-hexane = 1/20, flow rate 1.0 mL/min  
detection 210 nm

**(2*S*,3*R*)-2-Nitroundecan-3-ol (4ma)**

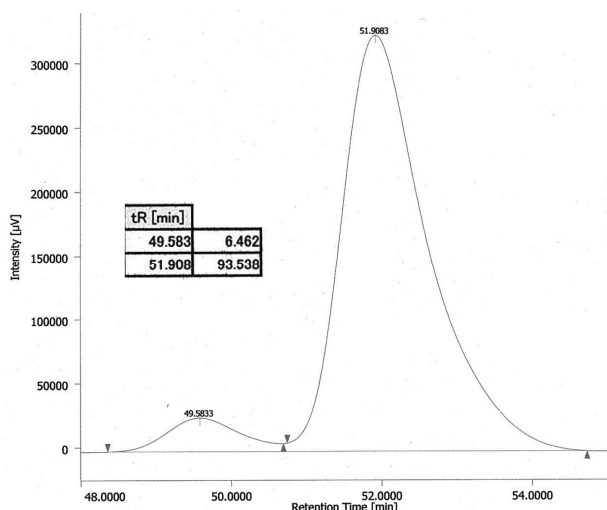

CHIRALPAK AD-H ( $\phi$  0.46 cm x 25 cm)  
2-propanol/*n*-hexane = 1/99, flow rate 0.5 mL/min  
detection 210 nm

**(1*R*,2*S*)-2-Nitro-1-phenylbutan-1-ol (4ab)**

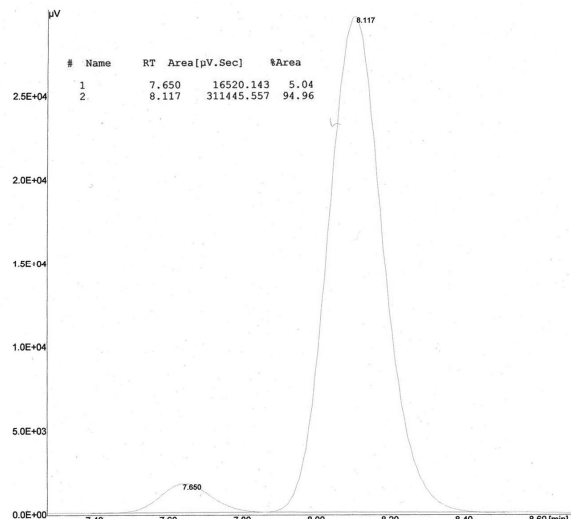

CHIRALPAK AD-H ( $\phi$  0.46 cm x 25 cm)  
2-propanol/*n*-hexane = 1/9, flow rate 1.0 mL/min  
detection 254 nm

**(1*R*,2*S*)-1-(4-Fluorophenyl)-2-nitro-1-butanol (4eb)**

Colorless oil; IR (neat)  $\nu$  3446, 1610, 1548, 1509  $\text{cm}^{-1}$ ;  $^1\text{H}$  NMR ( $\text{CDCl}_3$ )  $\delta$  0.92 (t,  $J$  = 7.4 Hz, 3H), 1.85-1.93 (m, 1H), 2.08-2.17 (m, 1H), 2.72 (d,  $J$  = 3.1 Hz, 1H), 4.52 (ddd,  $J$  = 3.4, 5.2, 10.7 Hz, 1H), 5.13 (dd,  $J$  = 2.8, 4.9 Hz, 1H), 7.04 (dd,  $J$  = 8.6, 8.9 Hz, 2H), 7.33 (dd,  $J$  = 5.2, 8.9 Hz, 2H);  $^{13}\text{C}$  NMR ( $\text{CDCl}_3$ )  $\delta$  10.3, 21.5, 73.6, 94.6, 115.7 (d,  $J$  = 21.7 Hz), 128.0 (d,  $J$  = 8.3 Hz), 134.3 (d,  $J$  = 3.1 Hz), 162.8 (d,  $J$  = 247.0 Hz);  $[\alpha]_D^{25}$  +7.1 (c 0.65,  $\text{CHCl}_3$ , 90% ee sample); ESI-MS  $m/z$  236  $[\text{M}+\text{Na}]^+$ ; HRMS (FAB) Anal. calcd. for  $\text{C}_{10}\text{H}_{12}\text{NO}_3\text{F}$   $m/z$  345.9856  $[\text{M}+\text{Cs}]^+$ , found 345.9852; CHIRALPAK AS-H (0.46 cm  $\phi$  x 25 cm), 2-propanol/*n*-hexane = 1/9, 1.0 mL/min, detection 254 nm,  $t_R$  = 9.4 min

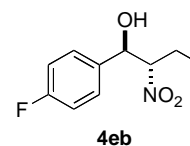



(minor), 9.8 min (major).

Relative configuration was determined after conversion to the corresponding carbamate.

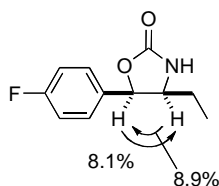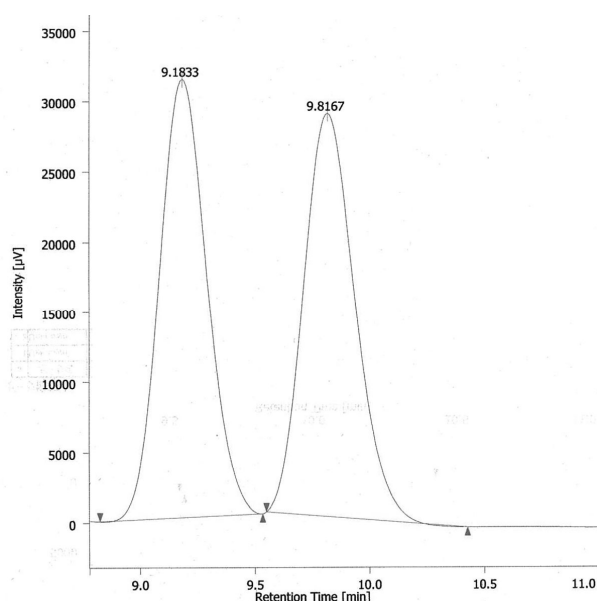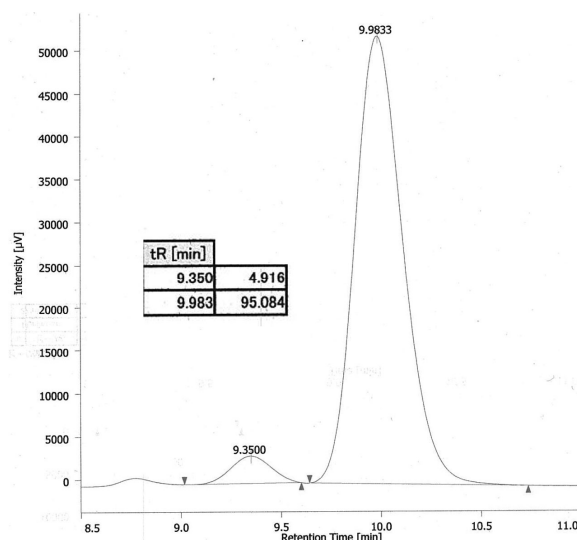

#### (1*R*,2*S*)-1-Phenyl-2-nitro-3-(*tert*-butyldimethylsilyloxy)-1-propanol (**4ac**)

*Anti* and *syn* diastereomers were separated by preparative chiral stationary phase HPLC (CHIRALPAK AS-H ( $\phi$  2.0 cm x 20 cm), 2-propanol/*n*-hexane = 1/9, flow rate 5.0 mL/min, detection 254 nm)

Colorless oil; IR (neat)  $\nu$  3456, 2933, 2363, 1556  $\text{cm}^{-1}$ ;  $^1\text{H}$  NMR ( $\text{CDCl}_3$ )  $\delta$  0.03 (s, 3H), 0.03 (s, 3H), 0.84 (s, 9H), 3.09 (brd, 1H), 4.11 (dd,  $J = 3.7, 11.6$  Hz, 1H), 4.22 (dd,  $J = 7.7, 11.6$  Hz, 1H), 4.73 (ddd,  $J = 3.4, 5.5, 8.8$  Hz, 1H), 5.28 (dd,  $J = 4.3, 5.5$  Hz, 1H), 7.30-7.35 (m, 1H), 7.35-7.37 (m, 4H);  $^{13}\text{C}$  NMR ( $\text{CDCl}_3$ )  $\delta$  -5.8, -5.7, 18.0, 25.6, 61.0, 92.6, 126.0, 128.8, 128.8, 138.5;  $[\alpha]_{\text{D}}^{26} -14.6$  ( $c$  0.75,  $\text{CHCl}_3$ , 90% ee sample); ESI-MS  $m/z$  334  $[\text{M}+\text{Na}]^+$ ; HRMS (FAB) Anal. calcd. for  $\text{C}_{15}\text{H}_{25}\text{NO}_4\text{Si}$   $m/z$  444.0607  $[\text{M}+\text{Cs}]^+$ , found 444.0606; CHIRALPAK AS-H (0.46 cm  $\phi$  x 25 cm), 2-propanol/*n*-hexane = 1/9, flow rate 1.0 mL/min, detection 254 nm,  $t_{\text{R}} = 4.9$  min (minor), 5.6 min (major).

Relative configuration was determined after conversion to the corresponding carbamate.

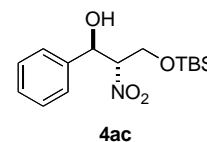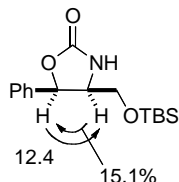

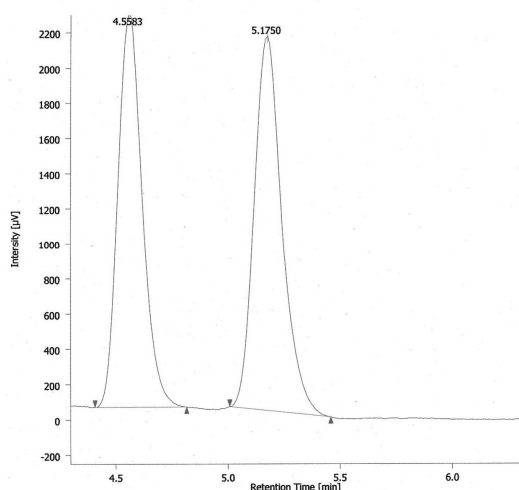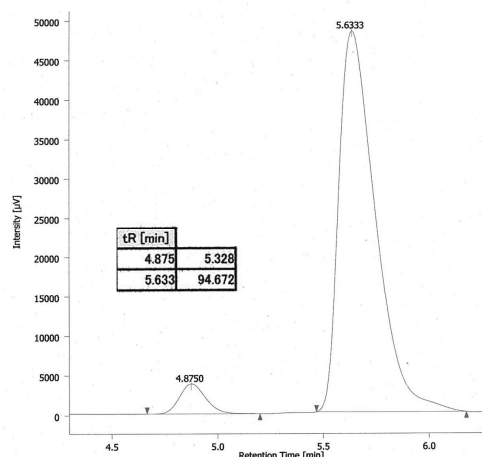

### (1*R*,2*S*)-1-Phenyl-2-nitro-3-(benzyloxy)-1-propanol (**4ad**)

Colorless oil; IR (neat)  $\nu$  3442, 2921, 1553  $\text{cm}^{-1}$ ;  $^1\text{H}$  NMR ( $\text{CDCl}_3$ )  $\delta$  2.94 (d,  $J = 4.3$  Hz, 1H), 3.94 (dd,  $J = 3.1, 11.0$  Hz, 1H), 4.13 (dd,  $J = 8.3, 11.0$  Hz, 1H), 4.49 (d,  $J = 11.9$  Hz, 1H), 4.53 (d,  $J = 11.9$  Hz, 1H), 4.88 (ddd,  $J = 3.1, 5.2, 8.3$  Hz, 1H), 5.30 (dd,  $J = 4.3, 5.2$  Hz, 1H), 7.24-7.27 (m, 2H), 7.28-7.40 (m, 8H);  $^{13}\text{C}$  NMR ( $\text{CDCl}_3$ )  $\delta$  66.8, 73.2, 73.6, 91.1, 126.0, 127.7, 128.0, 128.5, 128.8, 128.8, 136.8, 138.2;  $[\alpha]_D^{26} -17.7$  ( $c$  0.87,  $\text{CHCl}_3$ , >99% ee sample (ee has been changed by separation of diastereomers by preparative chiral HPLC)); ESI-MS  $m/z$  310  $[\text{M}+\text{Na}]^+$ ; HRMS (FAB) Anal. calcd. for  $\text{C}_{16}\text{H}_{17}\text{NO}_4$   $m/z$  420.0212  $[\text{M}+\text{Cs}]^+$ , found 420.0214; CHIRALPAK AS-H (0.46 cm  $\phi$  x 25 cm), 2-propanol/*n*-hexane = 1/9, flow rate 1.0 mL/min, detection 254 nm,  $t_R = 19.1$  min (minor), 24.2 min (major). Relative configuration was determined after conversion to the corresponding carbamate.

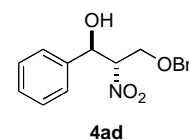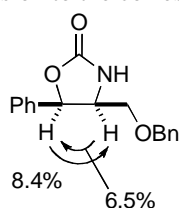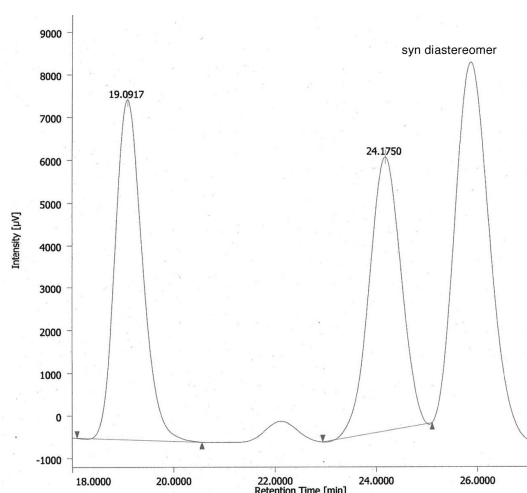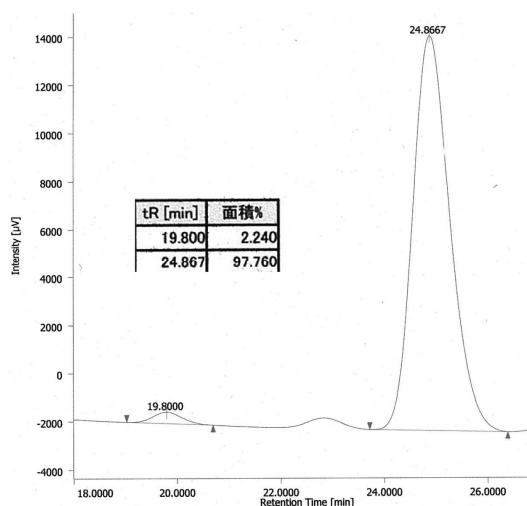

## 3. Synthesis of Ligand 1

Synthesis of **1a**, **1b**, **1g** was reported in the literature;

Reg #; **1a**: 952656-51-8, **1b**: 1006060-01-0, **1g**: 1006060-05-4.

Synthesis of **1a** and **1g** was reported in ref in ref 10a in maitext and ref s1, respectively. **1b**, **1c-f** were synthesized by

following the procedure reported in these references.

### Synthesis of **1h**

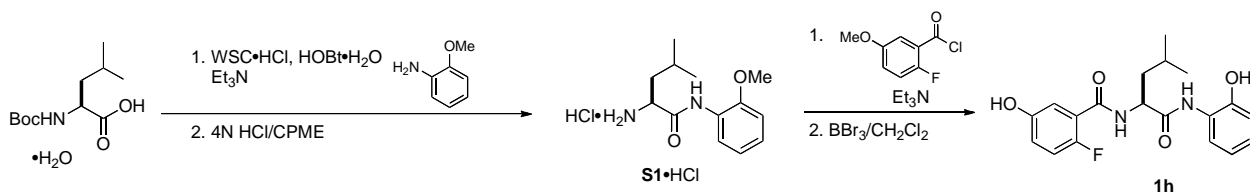

#### (S)-2-Amino-N-(2-methoxyphenyl)-4-methylpentanamide (**S1**)

To a stirred solution of 2-methoxyaniline (5.4 mL, 48 mmol) in  $\text{CH}_2\text{Cl}_2$  (480 mL) were added Boc-L-Leu-OH· $\text{H}_2\text{O}$  (10 g, 40 mmol),  $\text{Et}_3\text{N}$  (6.7 mL, 48 mmol), WSC·HCl (8.1 g, 42 mmol), and HOBt· $\text{H}_2\text{O}$  (1.8 g, 12 mmol) at 0 °C. After stirring at room temperature for 25 h, the reaction mixture was quenched with 1N HCl aq. and extracted with ether. The combined organic layers were washed with 1N HCl aq. and brine, then dried over  $\text{Na}_2\text{SO}_4$ . Filtrate was concentrated and the resulting residue was recrystallized from ether/*n*-hexane to give amide (5.15 g, y. 38%) as a white solid. To a stirred solution of the amide (5.0 g, 15 mmol) in  $\text{CH}_2\text{Cl}_2$  (5.0 mL) was added 4N HCl/CPME (15 mL) at 0 °C. After stirring at room temperature overnight, volatiles were removed under reduced pressure and the resulting residue was recrystallized from  $\text{CH}_2\text{Cl}_2$ /ether to give **S1**·HCl (4.1 g, quantitative yield) as a colorless solid. Free amine **S1** was obtained by partition with ethyl acetate/ $\text{NaHCO}_3$  aq.

Colorless solid; IR (KBr)  $\nu$  3386, 3259, 2962, 1666, 1599  $\text{cm}^{-1}$ ; m.p. 93-94 °C;  $^1\text{H}$  NMR ( $\text{CD}_3\text{OD}$ )  $\delta$  0.97 (d,  $J$  = 7.4 Hz, 3H), 0.99 (d,  $J$  = 7.5 Hz, 3H), 1.40-1.47 (m, 1H), 1.63-1.69 (m, 1H), 1.76-1.84 (m, 1H), 3.50 (dd,  $J$  = 4.6, 9.2 Hz, 1H), 3.88 (s, 3H), 6.91 (dd,  $J$  = 7.5, 8.0 Hz, 1H), 7.00 (d,  $J$  = 8.6 Hz, 1H), 7.08 (dd,  $J$  = 7.4, 8.1 Hz, 1H), 8.10-8.14 (m, 1H);  $^{13}\text{C}$  NMR ( $\text{CD}_3\text{OD}$ )  $\delta$  22.1, 23.7, 25.9, 45.4, 55.3, 56.3, 111.6, 121.6, 121.8, 125.7, 128.2, 150.9, 176.8;  $[\alpha]_{\text{D}}^{25}$  -13.9 ( $c$  1.2, MeOH); ESI-MS  $m/z$  259  $[\text{M}+\text{Na}]^+$ ; HRMS (FAB) Anal. calcd. for  $\text{C}_{13}\text{H}_{20}\text{N}_2\text{O}_2$   $m/z$  369.0579  $[\text{M}+\text{Cs}]^+$ , found 369.0579.

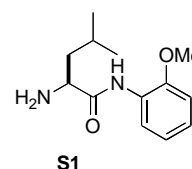

#### 2-Fluoro-5-methoxybenzoyl chloride

To a  $\text{CH}_2\text{Cl}_2$  solution (400 mL) of 2-fluoro-5-methoxybenzoic acid<sup>52</sup> (19.0 g, 111 mmol) was added oxalyl chloride (13.4 mL, 156 mmol) and dry DMF (100  $\mu\text{L}$ ) at 0 °C and the resulting mixture was stirred at room temperature for 2 h. The volatiles were removed under reduced pressure, and the resulting solid residue was dissolved in  $\text{CH}_2\text{Cl}_2$  to give 1.0 M/ $\text{CH}_2\text{Cl}_2$  solution containing the title compound, which was used in the following procedures.

#### (S)-2-Fluoro-5-hydroxy-N-(1-(2-hydroxyphenylamino)-4-methyl-1-oxopentan-2-yl)benzamide (**1h**)

To a stirred solution of **S1**·HCl (272 mg, 1.0 mmol) in  $\text{CH}_2\text{Cl}_2$  (10 mL) were added  $\text{Et}_3\text{N}$  (350  $\mu\text{L}$ , 2.5 mmol) and 2-fluoro-5-methoxybenzoyl chloride (1.0 M/ $\text{CH}_2\text{Cl}_2$ , 1.0 mL, 1.0 mmol) at 0 °C and the resulting mixture was stirred at room temperature for 1 h. Volatiles were removed under reduced pressure and the resulting residue was partitioned with 1N HCl aq. and ethyl acetate. Organic layer was washed with sat.  $\text{NaHCO}_3$  aq. and brine, then dried over  $\text{Na}_2\text{SO}_4$ . Filtration and removal of organic solvent under reduced pressure gave the brown residue, which was purified by silica gel column chromatography to give diamide (390 mg) as a colorless solid. To the  $\text{CH}_2\text{Cl}_2$  solution (10 mL) of diamide (390 mg) was added  $\text{BBr}_3$  (1.0 M/ $\text{CH}_2\text{Cl}_2$ , 6.0 mL, 6.0 mmol) at 0 °C and the resulting solution was stirred at the same temperature for 5 h.  $\text{H}_2\text{O}$  was added at 0 °C and the resulting biphasic mixture was extracted with  $\text{CH}_2\text{Cl}_2$  twice, and the combined organic layers were washed with sat.  $\text{NaHCO}_3$  aq. and brine, then dried over  $\text{Na}_2\text{SO}_4$ . Filtrate was concentrated and the resulting residue was recrystallized from  $\text{CH}_2\text{Cl}_2$ /*n*-hexane to give **1h** (190 mg, y. 53% from **S1**·HCl) as a colorless solid.

Colorless solid; IR (KBr)  $\nu$  3288, 2958, 1647, 1597  $\text{cm}^{-1}$ ; m.p. 63-64 °C;  $^1\text{H}$  NMR ( $\text{CD}_3\text{OD}$ )  $\delta$  1.02 (d,  $J$  = 6.3 Hz, 3H), 1.03 (d,  $J$  = 6.3 Hz, 3H), 1.76-1.84 (m, 3H), 4.78-4.81 (m, 1H), 6.78-6.86 (m, 2H), 6.91 (ddd,  $J$  = 4.1, 7.5, 7.5 Hz, 1H), 6.98 (ddd,  $J$  = 1.1, 7.4, 8.1 Hz, 1H), 7.05 (dd,  $J$  = 8.6, 9.8 Hz, 1H), 7.12 (dd,  $J$  = 3.4, 5.8 Hz, 1H), 7.82 (dd,  $J$  = 1.2, 8.1 Hz, 1H);  $^{13}\text{C}$  NMR ( $\text{CD}_3\text{OD}$ )  $\delta$  21.9, 23.5, 26.1, 41.8, 54.6, 116.5, 116.9 (d,  $J$  = 2.1 Hz), 117.9 (d,  $J$  = 24.8 Hz), 120.6 (d,  $J$  = 3.1 Hz), 120.6 (d,  $J$  = 5.2 Hz), 123.0, 124.0 (d,  $J$  = 15.5 Hz), 126.5, 126.8, 149.2, 154.9 (d,  $J$  = 237.6 Hz), 155.0, 167.0, 172.9;  $^{19}\text{F}$  NMR ( $\text{CD}_3\text{OD}$ )  $\delta$  -129.0;  $[\alpha]_{\text{D}}^{26}$  -20.0 ( $c$  2.3, MeOH); ESI-MS  $m/z$  383  $[\text{M}+\text{Na}]^+$ ; HRMS (FAB) Anal. calcd. for  $\text{C}_{19}\text{H}_{21}\text{N}_2\text{O}_4$   $m/z$  493.0540  $[\text{M}+\text{Cs}]^+$ , found 493.0528.

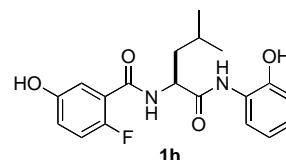

### Synthesis of **1i**

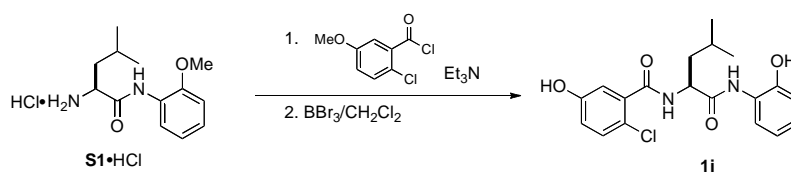

### 2-Chloro-5-methoxybenzoyl chloride

To a  $\text{CH}_2\text{Cl}_2$  solution (6.0 mL) of 2-chloro-5-methoxybenzoic acid (258 mg, 1.35 mmol) was added oxalyl chloride (227  $\mu\text{L}$ , 2.71 mmol) and dry DMF (1 drop) at 0 °C and the resulting mixture was stirred at room temperature for 1 h. The volatiles were removed under reduced pressure, and the resulting residue was dissolved in  $\text{CH}_2\text{Cl}_2$  (6.0 mL) and used in the following procedures.

### (S)-2-Chloro-5-hydroxy-N-(1-(2-hydroxyphenylamino)-4-methyl-1-oxopentan-2-yl)benzamide (1i)

To a stirred solution of **S1**•HCl (336 mg, 1.23 mmol) in  $\text{CH}_2\text{Cl}_2$  (6.0 mL) were added  $\text{Et}_3\text{N}$  (430  $\mu\text{L}$ , 3.1 mmol) and 2-chloro-5-methoxybenzoyl chloride prepared in the procedure described above at 0 °C. After stirring at room temperature overnight, 1N HCl aq. was added and the resulting mixture was extracted with ethyl acetate twice. The combined organic layers were washed with sat.  $\text{NaHCO}_3$  aq. and brine, then dried over  $\text{Na}_2\text{SO}_4$ . Filtration and removal of organic solvent under reduced pressure gave the crude diamide as a brown residue. To the  $\text{CH}_2\text{Cl}_2$  solution (5.4 mL) of the crude diamide was added  $\text{BBr}_3$  (1.0 M/ $\text{CH}_2\text{Cl}_2$ , 2.7 mL, 2.7 mmol) at 0 °C and the resulting solution was stirred at the same temperature for 1 h. After stirring at room temperature for 2 h,  $\text{H}_2\text{O}$  was added at 0 °C and the resulting biphasic mixture was extracted with ethyl acetate twice, and the combined organic layers were washed with brine, then dried over  $\text{Na}_2\text{SO}_4$ . Filtrate was concentrated and the resulting residue was recrystallized from  $\text{CHCl}_3$  to give **1i** (135 mg, 29% yield from **S1**•HCl) as a colorless solid.

Colorless solid; IR (KBr)  $\nu$  3369, 3259, 2956, 1676, 1641, 1540, 1460  $\text{cm}^{-1}$ ; m.p. 147-148 °C;  $^1\text{H}$  NMR ( $\text{CD}_3\text{OD}$ )  $\delta$  1.01 (d,  $J$  = 6.4 Hz, 3H), 1.02 (d,  $J$  = 6.4 Hz, 3H), 1.76-1.79 (m, 2H), 1.83-1.89 (m, 1H), 4.74 (d,  $J$  = 6.7, 8.6 Hz, 1H), 6.81 (ddd,  $J$  = 1.5, 7.9, 7.9 Hz, 1H), 6.84 (dd,  $J$  = 6.7, 8.6 Hz, 1H), 6.93 (d,  $J$  = 3.1 Hz, 1H), 6.93 (dd,  $J$  = 1.5, 7.9 Hz, 1H), 7.24 (d,  $J$  = 8.8 Hz, 1H), 7.86 (dd,  $J$  = 1.5, 7.9 Hz, 1H);  $^{13}\text{C}$  NMR ( $\text{CD}_3\text{OD}$ )  $\delta$  21.7, 23.5, 26.0, 41.4, 54.4, 116.4, 116.6, 119.2, 120.6, 121.4, 122.7, 126.4, 126.9, 131.8, 137.8, 149.0, 157.7, 170.3, 172.7;  $[\alpha]_{\text{D}}^{26}$  -67.1 ( $c$  1.4, MeOH); ESI-MS  $m/z$  399  $[\text{M}+\text{Na}]^+$ ; HRMS (FAB) Anal. calcd. for  $\text{C}_{19}\text{H}_{21}\text{N}_2\text{O}_4\text{Cl}$   $m/z$  509.0244  $[\text{M}+\text{Cs}]^+$ , found 509.0250.

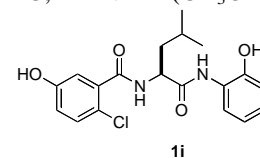

### Synthesis of 1j

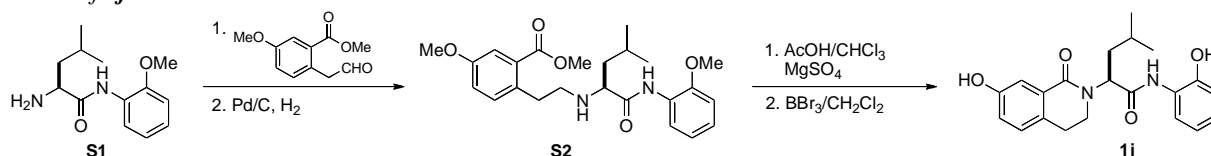

### (S)-N-(2-Hydroxyphenyl)-2-(3-hydroxybenzoylamino)-4-methylpentanamide (S4)

To a stirred solution of (4-methoxy-2-methoxycarbonylbenzyl)acetaldehyde (10 mg, 0.048 mmol, Reg #: 959631-90-4) in MeOH (0.5 mL) were added **S1** (10 mg, 0.042 mmol) and Pd/C (3.0 mg, 10 wt%) at room temperature and the resulting suspension was stirred under hydrogen atmosphere. After stirring for 2.5 h, the reaction mixture was filtered through a pad of Celite and the filtrate was concentrated. The residue was purified by silica gel column chromatography (ethyl acetate/*n*-hexane = 1/4) to give **S2** as a colorless oil (13.1 mg, 72% yield).

Colorless oil; IR (neat)  $\nu$  3307, 2954, 1720, 1680, 1523  $\text{cm}^{-1}$ ;  $^1\text{H}$  NMR ( $\text{CD}_3\text{OD}$ )  $\delta$  0.94 (d,  $J$  = 6.7 Hz, 3H), 0.97 (d,  $J$  = 6.7 Hz, 3H), 1.46 (ddd,  $J$  = 6.1, 8.6, 13.1 Hz, 1H), 1.58 (ddd,  $J$  = 5.5, 8.3, 13.7 Hz, 1H), 1.70-1.78 (m, 1H), 2.76 (ddd,  $J$  = 6.7, 8.6, 15.0 Hz, 1H), 2.84 (ddd,  $J$  = 6.4, 8.2, 14.3 Hz, 1H), 3.05-3.14 (m, 1H), 3.23 (dd,  $J$  = 5.5, 8.6 Hz, 1H), 3.77 (s, 3H), 3.80 (s, 3H), 3.86 (s, 3H), 6.91 (ddd,  $J$  = 1.3, 7.6, 7.9 Hz, 1H), 6.98-7.04 (m, 2H), 7.09 (ddd,  $J$  = 1.5, 7.6, 8.0 Hz, 1H), 7.23 (d,  $J$  = 8.6 Hz, 1H), 7.34 (d,  $J$  = 2.8 Hz, 1H), 8.05 (dd,  $J$  = 1.5, 7.9 Hz, 1H);  $^{13}\text{C}$  NMR ( $\text{CD}_3\text{OD}$ )  $\delta$  22.6, 23.5, 26.2, 35.1, 44.1, 51.5, 52.5, 55.8, 56.3, 63.3, 111.6, 116.5, 119.1, 121.5, 121.9, 125.8, 128.0, 131.8, 133.6, 134.4, 151.0, 159.3, 169.3, 176.0;  $[\alpha]_{\text{D}}^{26}$  -56.0 ( $c$  0.2, MeOH); ESI-MS  $m/z$  451  $[\text{M}+\text{Na}]^+$ ; HRMS (FAB) Anal. calcd. for  $\text{C}_{24}\text{H}_{32}\text{N}_2\text{O}_5$   $m/z$  561.1366  $[\text{M}+\text{Cs}]^+$ , found 561.1371.

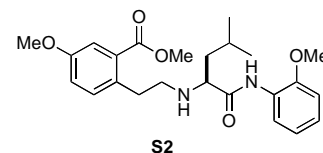

### (S)-2-(7-Hydroxy-1-oxo-3,4-dihydroisoquinolin-2(1H)-yl)-N-(2-hydroxyphenyl)-4-methylpentanamide (1j)

To a stirred solution of **S2** (256 mg, 0.6 mmol) in  $\text{CHCl}_3$  (10 mL) were added AcOH (10 drops) and  $\text{MgSO}_4$  (1.0 g) at

room temperature. After stirring at room temperature for 12 h, the reaction mixture was filtered through a pad of Celite and the filtrate was concentrated. The residue was purified by silica gel column chromatography (ethyl acetate/*n*-hexane = 1/4) to give lactam (231 mg, 97% yield) as a colorless oil. To the CH<sub>2</sub>Cl<sub>2</sub> solution (2.3 mL) of the lactam was added BBr<sub>3</sub> (1.0 M/CH<sub>2</sub>Cl<sub>2</sub>, 2.3 mL, 2.3 mmol) at 0 °C and the resulting solution was stirred at the same temperature for 2 h. After stirring at room temperature for 2 h, H<sub>2</sub>O was added at 0 °C and the resulting biphasic mixture was extracted with ethyl acetate twice, and the combined organic layers were washed with brine, then dried over Na<sub>2</sub>SO<sub>4</sub>. Filtrate was concentrated and the resulting residue was purified by silica gel column chromatography (ethyl acetate/*n*-hexane = 1/3 to 1/1) to give **1j** (144 mg, 87% yield, 2 steps) as a colorless solid.

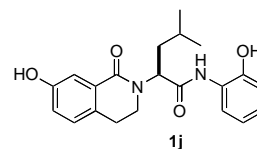

**1j**

Colorless oil; IR (KBr)  $\nu$  3290, 2957, 1601, 1533, 1455, 1318, 751 cm<sup>-1</sup>; m.p. 83-84 °C; <sup>1</sup>H NMR (CDCl<sub>3</sub>)  $\delta$  0.91 (d, *J* = 6.7 Hz, 3H), 0.93 (d, *J* = 6.7 Hz, 3H), 1.51-1.58 (m, 1H), 1.76-1.89 (m, 1H), 2.49 (brs, 1H), 2.78-2.88 (m, 2H), 3.53 (ddd, *J* = 5.5, 7.6, 13.1 Hz, 1H), 3.61 (ddd, *J* = 5.5, 7.6, 12.8 Hz, 1H), 5.51 (dd, *J* = 6.7, 8.8 Hz, 1H), 6.77 (dd, *J* = 7.2, 8.7 Hz, 1H), 6.90 (dd, *J* = 2.4, 8.2 Hz, 1H), 6.93 (dd, *J* = 1.2, 8.2 Hz, 1H), 6.96 (d, *J* = 8.2 Hz, 1H), 6.99 (ddd, *J* = 1.2, 7.2, 8.0 Hz, 1H), 7.36 (d, *J* = 8.0 Hz, 1H), 7.62 (d, *J* = 2.4 Hz, 1H), 7.96 (brs, 1H), 8.74 (brs, 1H), 8.91 (s, 1H); <sup>13</sup>C NMR (CDCl<sub>3</sub>)  $\delta$  22.0, 13.0, 24.9, 27.1, 36.5, 42.0, 55.2, 114.9, 118.3, 120.3, 120.5, 122.3, 125.7, 126.5, 128.4, 129.0, 129.9, 147.8, 155.4, 166.2, 170.1; [ $\alpha$ ]<sub>D</sub><sup>25</sup> -173 (*c* 0.29, CHCl<sub>3</sub>); ESI-MS *m/z* 391 [M+Na]<sup>+</sup>; HRMS (FAB) Anal. calcd. for C<sub>21</sub>H<sub>24</sub>N<sub>2</sub>O<sub>4</sub>CS *m/z* 501.0791 [M+Cs]<sup>+</sup>, found 501.0808.

### Synthesis of **1k**

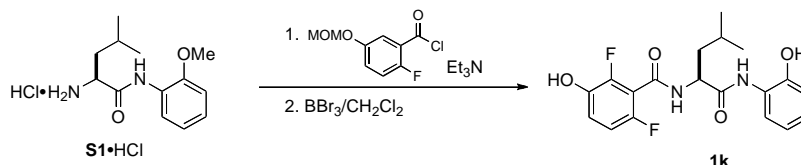

**1k**

### (*S*)-2,6-Difluoro-3-hydroxy-*N*-(1-(2-hydroxyphenylamino)-4-methyl-1-oxopentane-2-yl)benzamide (**1k**)

To a stirred solution of 2,6-difluoro-3-(methoxymethoxy)benzoic acid<sup>s3</sup> (220 mg, 1.01 mmol) in CHCl<sub>3</sub> (3.5 mL) were added **S1·HCl** (275 mg, 1.01 mmol), Et<sub>3</sub>N (153  $\mu$ L, 1.11 mmol), DCC (250 mg, 1.21 mmol), and DMAP (12 mg, 0.10 mmol) at room temperature. After stirring at the same temperature for 12 h, the reaction mixture was filtered through a pad of Celite and the filtrate was concentrated. The residue was purified by silica gel column chromatography (ethyl acetate/*n*-hexane = 1/4 to 1/1) to give diamide (423 mg, 97% yield) as a colorless oil. To the CH<sub>2</sub>Cl<sub>2</sub> solution (2.0 mL) of the lactam was added BBr<sub>3</sub> (1.0 M/CH<sub>2</sub>Cl<sub>2</sub>, 5.0 mL, 5.0 mmol) at 0 °C and the resulting solution was stirred at the same temperature for 2 h. MeOH (10 mL) and H<sub>2</sub>O (5.0 mL) were successively added at 0 °C. After stirring at room temperature for 2 h, volatiles were removed under reduced pressure. The residue was taken up with H<sub>2</sub>O and extracted with ethyl acetate twice, and the combined organic layers were washed with H<sub>2</sub>O and brine, then dried over Na<sub>2</sub>SO<sub>4</sub>. Filtrate was concentrated and the resulting residue was purified by silica gel column chromatography (ethyl acetate/*n*-hexane = 1/4 to 1/1) to give **1k** (388 mg, y. 89%, 2 steps) as a colorless solid.

Colorless solid; IR (KBr)  $\nu$  3276, 2960, 1653, 1537 cm<sup>-1</sup>; m.p. 73-74 °C; <sup>1</sup>H NMR (CD<sub>3</sub>OD)  $\delta$  1.02 (d, *J* = 6.7 Hz, 6H), 1.75-1.88 (m, 3H), 4.78-4.82 (m, 1H), 6.79-6.89 (m, 3H), 6.96-7.01 (m, 2H), 7.84 (dd, *J* = 1.5, 7.9 Hz, 1H); <sup>13</sup>C NMR (CD<sub>3</sub>OD)  $\delta$  21.7, 23.5, 25.9, 41.6, 54.4, 112.1 (dd, *J* = 2.4, 22.6 Hz), 115.9 (dd, *J* = 19.1, 22.6 Hz), 116.5, 119.9 (d, *J* = 8.3 Hz), 120.6, 122.8, 126.4, 126.9, 143.0 (dd, *J* = 2.4, 11.9 Hz), 149.1, 149.1 (dd, *J* = 8.3, 246.8 Hz), 153.1

(dd, *J* = 4.8, 242.0 Hz), 163.8, 172.5; <sup>19</sup>F NMR (CD<sub>3</sub>OD)  $\delta$  -138.8, -138.7; [ $\alpha$ ]<sub>D</sub><sup>26</sup> -20.3 (*c* 1.9, MeOH); ESI-MS *m/z* 401 [M+Na]<sup>+</sup>. HRMS (FAB) Anal. calcd. for C<sub>19</sub>H<sub>20</sub>N<sub>2</sub>O<sub>4</sub>F<sub>2</sub>CS *m/z* 511.0445 [M+Cs]<sup>+</sup>, found 511.0449.

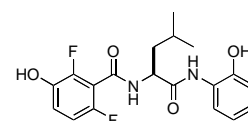

**1k**

### Synthesis of **1l**

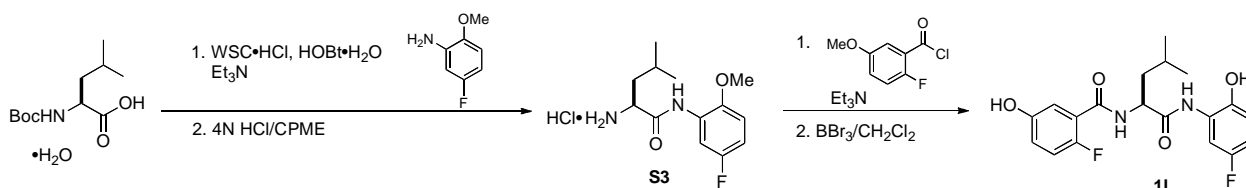

**1l**

### (*S*)-2-Amino-*N*-(5-fluoro-2-methoxyphenyl)-4-methylpentanamide hydrochloride (**S3**)

To a stirred solution of 5-fluoro-2-methoxyaniline (564 mg, 4.0 mmol) in CH<sub>2</sub>Cl<sub>2</sub> (20 mL) were added

Boc-L-Leu-OH•H<sub>2</sub>O (1.5 g, 6.0 mmol), Et<sub>3</sub>N (1.11 mL, 8.0 mmol), WSC•HCl (1.15 g, 6.0 mmol), and HOBt•H<sub>2</sub>O (612 mg, 4.0 mmol) at 0 °C. After stirring at room temperature for 11 h, the reaction mixture was quenched with 1N HCl aq. and extracted with ethyl acetate. The combined organic layers were washed with sat. NaHCO<sub>3</sub> aq. and brine, then dried over Na<sub>2</sub>SO<sub>4</sub>. Filtrate was concentrated and the resulting residue was purified by silica gel column chromatography (ethyl acetate/*n*-hexane = 1/10 to 1/3) to give amide (600 mg, 42% yield) as a colorless solid. To a stirred solution of the amide (600 mg) in CH<sub>2</sub>Cl<sub>2</sub> (2.0 mL) was added 4N HCl/CPME (6.0 mL) at 0 °C. After stirring at room temperature overnight, volatiles were removed under reduced pressure and the resulting residue was recrystallized from MeOH/ether to give **S3** (192 mg, 66% yield, 2 steps) as a colorless solid.

Colorless solid; IR (KBr)  $\nu$  3410, 2960, 2048, 1701, 1541, 1502 cm<sup>-1</sup>; m.p. 88-89 °C (free amine); <sup>1</sup>H NMR (CD<sub>3</sub>OD)  $\delta$  1.03 (d, *J* = 5.7 Hz, 3H), 1.04 (d, *J* = 6.3 Hz, 3H), 1.73-1.83 (m, 3H), 3.90 (s, 3H), 4.23-4.27 (m, 1H), 6.87 (ddd, *J* = 2.9, 9.7, 9.7 Hz, 1H), 7.02 (dd, *J* = 5.2, 9.2 Hz, 1H), 7.92 (dd, *J* = 2.9, 10.3 Hz, 1H); <sup>13</sup>C NMR (CD<sub>3</sub>OD)  $\delta$  22.3, 23.1, 25.6, 41.8, 53.6, 56.9, 110.3 (d, *J* = 28.6 Hz), 111.9 (d, *J* = 22.6 Hz), 112.6 (d, *J* = 8.3 Hz), 128.4 (d, *J* = 10.7 Hz), 147.7 (d, *J* = 2.4 Hz), 157.8 (d, *J* = 236.1 Hz), 169.1; <sup>19</sup>F NMR (CD<sub>3</sub>OD)  $\delta$  -124.8; [ $\alpha$ ]<sub>D</sub><sup>25</sup> +16.8 (*c* 1.4, MeOH); ESI-MS *m/z* 277 [M+Na]<sup>+</sup>; HRMS (FAB) Anal. calcd. for C<sub>13</sub>H<sub>19</sub>N<sub>2</sub>O<sub>2</sub>FCs *m/z* 387.0485 [M+Cs]<sup>+</sup>, found 387.0474.

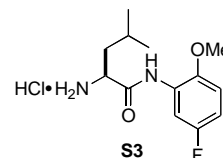

#### (S)-2-Fluoro-N-(1-(5-fluoro-2-hydroxyphenylamino)-4-methyl-1-oxopent-2-yl)-5-hydroxybenzamide (**11**)

To a stirred solution of **S3** (36.5 mg, 0.125 mmol) in CH<sub>2</sub>Cl<sub>2</sub> (1.5 mL) were added Et<sub>3</sub>N (52  $\mu$ L, 0.375 mmol) and 2-fluoro-5-methoxybenzoyl chloride (0.163 mmol/1.0 mL CH<sub>2</sub>Cl<sub>2</sub>) at 0 °C and the resulting mixture was stirred at room temperature for 20 min. The resulting mixture was partitioned with 1N HCl aq. and ethyl acetate, and organic layer was washed with sat. NaHCO<sub>3</sub> aq. and brine, then dried over Na<sub>2</sub>SO<sub>4</sub>. Filtrate was concentrated under reduced pressure to give crude diamide. To the CH<sub>2</sub>Cl<sub>2</sub> solution (1.5 mL) of the diamide (53.4 mg) was added BBr<sub>3</sub> (1.0 M/CH<sub>2</sub>Cl<sub>2</sub>, 625  $\mu$ L, 0.625 mmol) at 0 °C and the resulting solution was stirred at room temperature overnight. H<sub>2</sub>O was added at 0 °C and the resulting biphasic mixture was extracted with ethyl acetate, and the combined organic layers were washed with sat. NaHCO<sub>3</sub> aq. and brine, then dried over Na<sub>2</sub>SO<sub>4</sub>. Filtrate was concentrated and the resulting residue was purified by silica gel column chromatography (ethyl acetate/*n*-hexane = 1/4 to 1/1) to give **11** (21.5 mg, 45% yield, 2 steps) as a colorless solid.

Colorless solid; IR (KBr)  $\nu$  3290, 2960, 1628, 1534 cm<sup>-1</sup>; m.p. 70-71 °C; <sup>1</sup>H NMR (CD<sub>3</sub>OD)  $\delta$  1.00 (d, *J* = 7.1 Hz, 3H), 1.01 (d, *J* = 6.4 Hz, 3H), 1.77-1.85 (m, 3H), 4.78-5.00 (m, 1H), 6.68 (ddd, *J* = 3.1, 8.8, 8.9 Hz, 1H), 6.79 (dd, *J* = 5.2, 8.9 Hz, 1H), 6.89-6.93 (m, 1H), 7.04 (dd, *J* = 9.2, 10.4 Hz, 1H), 7.13 (dd, *J* = 3.1, 5.5 Hz, 1H), 7.81 (dd, *J* = 3.1, 10.7 Hz, 1H); <sup>13</sup>C NMR (CD<sub>3</sub>OD)  $\delta$  21.8, 23.5, 26.1, 41.5, 54.7, 109.1 (d, *J* = 28.6 Hz), 111.4 (d, *J* = 22.7 Hz), 116.1 (d, *J* = 9.5 Hz), 116.9, 117.9 (d, *J* = 25.0 Hz), 120.6 (d, *J* = 8.3 Hz), 124.0 (d, *J* = 15.5 Hz), 127.8 (d, *J* = 10.7 Hz), 144.6, 154.9 (d, *J* = 240.8 Hz), 155.0, 157.2 (d, *J* = 234.9 Hz), 167.2, 172.8; <sup>19</sup>F NMR (CD<sub>3</sub>OD)  $\delta$  -128.9, -126.0; [ $\alpha$ ]<sub>D</sub><sup>25</sup> -18.2 (*c* 1.8, MeOH); ESI-MS *m/z* 401 [M+Na]<sup>+</sup>; HRMS (FAB) Anal. calcd. for C<sub>19</sub>H<sub>24</sub>N<sub>2</sub>O<sub>4</sub>F<sub>2</sub>Cs *m/z* 511.0445 [M+Cs]<sup>+</sup>, found 511.0458.

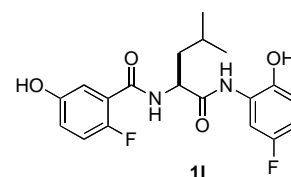

#### Synthesis of **1m**

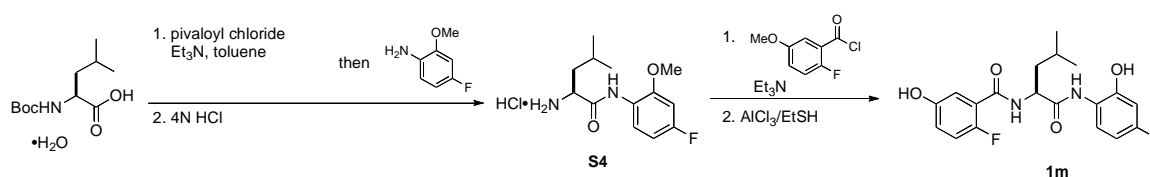

#### 4-Fluoro-2-methoxyaniline

To a solution of 5-fluoro-2-nitrophenol (44.5 g, 283.3 mmol) in acetone (550 mL) added K<sub>2</sub>CO<sub>3</sub> (54.8 g, 396.5 mmol) at room temperature. To the suspension was added MeI (48.2 g, 339.6 mmol) and the resulting suspension was stirred at room temperature for 9 h and refluxed for 3 h. Volatiles were removed under reduced pressure and the residue was taken up with H<sub>2</sub>O (260 g) and ethyl acetate (360 g). The organic layer was washed with H<sub>2</sub>O and brine (100 g), then dried over Na<sub>2</sub>SO<sub>4</sub>. Filtrate was concentrated and dried under vacuum to give 2-methoxy-4-fluoronitrobenzene (48.3 g, 99% yield) as a yellow solid. To a solution of 2-methoxy-4-fluoronitrobenzene (47.9 g, 279.9 mmol) in ethanol (300 mL, dissolved upon warming to ca. 40 °C) was added Pd/C (9.6 g, 10% w/w Merck) and the resulting suspension was stirred under hydrogen atmosphere at room temperature. After stirring for 18 h, small quantity of 2-methoxy-4-fluoronitrobenzene remained. Hydrogen was replaced with Ar and Pd/C in ethanol (100 mL) was added via syringe and the resulting suspension was stirred under hydrogen. After stirring for 6 h, the reaction mixture was

passed through a pad of Celite, and the filtrate was concentrated to give 4-fluoro-2-methoxyaniline (37.5 g, 95% yield) as a red oil. Reg # 450-91-9.

**(S)-2-Amino-N-(4-fluoro-2-methoxyphenyl)-4-methylpentanamide hydrochloride (S4)**

To a stirred suspension of Boc-L-Leu-OH•H<sub>2</sub>O (82.9 g, 332.5 mmol) in toluene (420 mL) was successively added Et<sub>3</sub>N (36.4 mL, 359.7 mmol) and pivaloyl chloride (40.1 mL, 332.6 mmol) at 0 °C. After stirring the resulting mixture at room temperature for 1.5 h, the resulting white suspension was filtrated and washed with toluene (50 mL x2). To the filtrate was added 4-fluoro-2-methoxyaniline (37.5 g, 265.7 mmol). After stirring the resulting mixture at room temperature for 30 min and at 40 °C for 1 h, the reaction mixture was diluted with ethyl acetate (500 g) and washed with 10% NaCl aq. (200g), 20% K<sub>2</sub>CO<sub>3</sub> aq. (200g x2), sat. NaHCO<sub>3</sub> aq. (200 g), 10% NaCl aq. (200 g), and brine (100 g), then dried over Na<sub>2</sub>SO<sub>4</sub>. After filtration and removal of the organic solvent under reduced pressure, the residue was dissolved in CH<sub>2</sub>Cl<sub>2</sub> (200 mL) and 4N HCl (340 mL, (150 mL in 1,4-dioxane, 190 mL in CPME)) was added to the resulting solution at 0 °C. After stirring at room temperature overnight, the resulting white suspension was filtered to collect the white solid and washed with CH<sub>2</sub>Cl<sub>2</sub> (200 mL). The white solid (177.7 g) was dissolved in warm MeOH (200 mL) and ether was added slowly (200 mL portion, total 1800 mL) and the resulting saturated solution/suspension was left stand at room temperature. The white solid was collected by filtration to give **S4** (63.4 g, 82% yield, 2 steps) as a white solid.

Colorless solid; IR (KBr)  $\nu$  3409, 2868, 2067, 1699, 1585, 1539, 1495 cm<sup>-1</sup>; m.p. 179-180 °C; <sup>1</sup>H NMR (CD<sub>3</sub>OD)  $\delta$  1.02 (d, *J* = 6.4 Hz, 3H), 1.04 (d, *J* = 6.4 Hz, 3H), 1.76-1.83 (m, 3H), 3.87 (s, 3H), 4.20 (dd, *J* = 6.7, 7.6 Hz, 1H), 6.66 (ddd, *J* = 2.5, 8.6, 8.8 Hz, 1H), 6.85 (dd, *J* = 2.5, 10.4 Hz, 1H), 7.81 (dd, *J* = 6.4, 8.8 Hz, 1H); <sup>13</sup>C NMR (CD<sub>3</sub>OD)  $\delta$  22.5, 23.0, 25.5, 41.9, 53.5, 56.7, 100.6 (d, *J* = 26.9 Hz), 107.2 (d, *J* = 22.7 Hz), 123.2 (d, *J* = 3.1 Hz), 125.7 (d, *J* = 10.3 Hz), 154.0 (d, *J* = 10.3 Hz), 162.3 (d, *J* = 242.9 Hz), 169.4; <sup>19</sup>F NMR (CD<sub>3</sub>OD)  $\delta$  -118.7; [ $\alpha$ ]<sub>D</sub><sup>25</sup> +1.8 (c 1.0, MeOH); ESI-MS *m/z* 255 [M+Na]<sup>+</sup>; HRMS (FAB) Anal. calcd. for C<sub>13</sub>H<sub>19</sub>N<sub>2</sub>O<sub>2</sub>FCs *m/z* 387.0485 [M+Cs]<sup>+</sup>, found 387.0474.

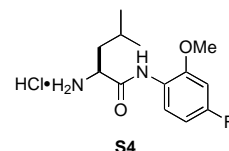

**(S)-2-fluoro-N-(1-(4-fluoro-2-hydroxyphenylamino)-4-methyl-1-oxopentan-2-yl)-5-hydroxybenzamide (1m)**

To a stirred suspension of the **S4** (63.4 g, 218.0 mmol) in CH<sub>2</sub>Cl<sub>2</sub> (200 mL) were added Et<sub>3</sub>N (48.6 g, 480.3 mmol) and 2-fluoro-5-methoxybenzoyl chloride (prepared by following the procedure described above, 38.9 g, 228.6 mmol in CH<sub>2</sub>Cl<sub>2</sub> (80 mL)) at 0 °C. After stirring the resulting solution at room temperature overnight (>8 h), the resulting mixture was washed with 1N HCl aq., sat. NaHCO<sub>3</sub> aq., and brine, then dried over Na<sub>2</sub>SO<sub>4</sub>. After filtration and removal of the organic solvent, the resulting residue was purified by flash silica gel column chromatography (ethyl acetate/*n*-hexane = 7/3 to 1/1) to give diamide (84.2 g, 95% yield) as a white solid. To a stirred solution of the diamide (660 mg, 1.62 mmol) in *n*-PrSH (8.0 mL) was added AlCl<sub>3</sub> (2.1 g, 15.7 mmol) at 0 °C and the resulting suspension was stirred at 0 °C for 6 h. After addition of CH<sub>2</sub>Cl<sub>2</sub> (10 mL) and MeOH (10 mL) at the same temperature, volatiles were removed under reduced pressure. The residue was partitioned with H<sub>2</sub>O and ethyl acetate, and the organic layer was washed with sat. NaHCO<sub>3</sub> aq. (x 2) and brine, then dried over Na<sub>2</sub>SO<sub>4</sub>. After filtration and removal of the organic solvent under reduced pressure, the residue was recrystallized from CHCl<sub>3</sub> to give **1m** as a colorless solid (407 mg, 66% yield, 1st crop).

**(S)-2-fluoro-N-(1-(4-fluoro-2-hydroxyphenylamino)-4-methyl-1-oxopentan-2-yl)-5-hydroxybenzamide (1m)**

Colorless solid; IR (KBr)  $\nu$  3201, 1649, 1532 cm<sup>-1</sup>; <sup>1</sup>H NMR (CD<sub>3</sub>OD)  $\delta$  1.00 (d, *J* = 6.9 Hz, 3H), 1.01 (d, *J* = 6.3 Hz, 3H), 1.73-1.85 (m, 3H), 4.78 (dd, *J* = 5.5, 9.5 Hz, 1H), 6.54 (ddd, *J* = 2.9, 8.6, 8.6 Hz, 1H), 6.59 (dd, *J* = 2.9, 9.7 Hz, 1H), 6.90 (ddd, *J* = 3.4, 4.0, 9.2 Hz, 1H), 7.03 (dd, *J* = 9.2, 10.3 Hz, 1H), 7.11 (dd, *J* = 3.4, 5.7 Hz, 1H), 7.75 (dd, *J* = 6.3, 9.2 Hz, 1H); <sup>13</sup>C NMR (CD<sub>3</sub>OD)  $\delta$  21.9, 23.5, 26.1, 41.8, 54.5, 103.7 (d, *J* = 20.9 Hz), 106.5 (d, *J* = 22.6 Hz), 116.9 (d, *J* = 2.4 Hz), 117.9 (d, *J* = 25.0 Hz), 120.6 (d, *J* = 8.3 Hz), 123.1 (d, *J* = 3.6 Hz), 124.0 (d, *J* = 15.5 Hz), 124.5 (d, *J* = 10.7 Hz), 151.1 (d, *J* = 11.9 Hz), 154.9 (d, *J* = 239.6 Hz), 155.5 (d, *J* = 2.4 Hz), 161.7 (d, *J* = 242.0 Hz), 167.0 (d, *J* = 2.4 Hz), 173.0; <sup>19</sup>F NMR (CD<sub>3</sub>OD)  $\delta$  -131.3, -121.2; [ $\alpha$ ]<sub>D</sub><sup>27</sup> -20.7 (c 1.05, MeOH); ESI-MS *m/z* 401 [M+Na]<sup>+</sup>; HRMS calcd. for C<sub>19</sub>H<sub>20</sub>N<sub>2</sub>O<sub>4</sub>F<sub>2</sub>Cs [M+Cs]<sup>+</sup> 511.0446, found 511.0466.

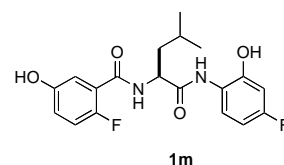

*ent*-**1m** was prepared by the analogous procedure.

HPLC: DAICEL CHIRALPAK AS-H (0.46 cm  $\phi$  x 25 cm), *n*-hexane/2-propanol = 4/1, column oven 30 °C, flow rate 1.0 mL/min, detection at 254 nm, *t*<sub>R</sub> 9.09 min (**1m** (*S*)) and 36.7 min (*ent*-**1m** (*R*)).

**Synthesis of 1n**

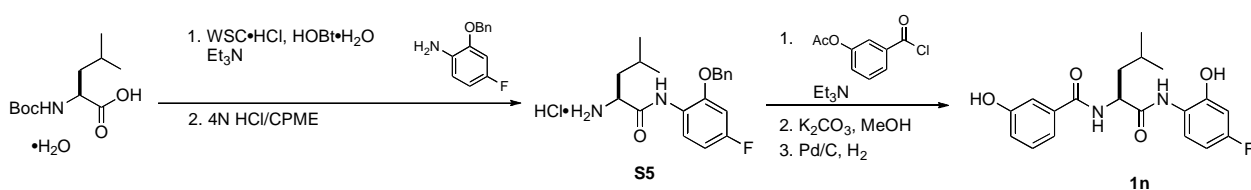

#### (S)-2-Amino-N-(2-(benzyloxy)-4-fluorophenyl)-4-methylpentanamide (S5)

To a stirred solution of 4-fluoro-2-benzyloxyaniline (2.17 g, 10 mmol) in  $\text{CH}_2\text{Cl}_2$  (50 mL) were added Boc-L-Leu-OH· $\text{H}_2\text{O}$  (3.74 g, 15 mmol),  $\text{Et}_3\text{N}$  (2.23 mL, 16 mmol), WSC·HCl (3.07 g, 16 mmol), and HOBT· $\text{H}_2\text{O}$  (460 mg, 3.0 mmol) at 0 °C. After stirring at room temperature for 24 h, the reaction mixture was quenched with 1N HCl aq. and extracted with ethyl acetate. The combined organic layers were washed with brine, then dried over  $\text{Na}_2\text{SO}_4$ . Filtrate was concentrated and the resulting residue was recrystallized from MeOH/ $\text{Et}_2\text{O}$  to give amide (1.96 g, 45% yield) as a white solid. To a stirred solution of the amide (1.96 g) in  $\text{CH}_2\text{Cl}_2$  (2.0 mL) was added 4N HCl/CPME (8.0 mL) at 0 °C. After stirring at the same temperature for 2 h, volatiles were removed under reduced pressure and the resulting residue was recrystallized from MeOH/ether to give **S5** (1.42 g, 39% yield, 2 steps) as a colorless solid.

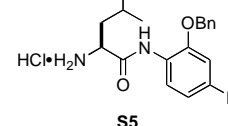

Colorless solid; IR (KBr)  $\nu$  3409, 1699, 1540, 1497, 1216  $\text{cm}^{-1}$ ; m.p. 180-181 °C;  $^1\text{H}$  NMR ( $\text{CD}_3\text{OD}$ )  $\delta$  0.90 (d,  $J$  = 9.8 Hz, 3H), 0.91 (d,  $J$  = 9.2 Hz, 3H), 1.65-1.74 (m, 3H), 4.10 (dd,  $J$  = 6.9, 6.9 Hz, 1H), 5.12 (s, 2H), 6.69 (ddd,  $J$  = 2.9, 8.9, 8.9 Hz, 1H), 6.94 (dd,  $J$  = 2.9, 10.9 Hz, 1H), 7.33-7.40 (m, 3H), 7.47 (d,  $J$  = 8.6 Hz, 2H), 7.66 (dd,  $J$  = 6.3, 8.9 Hz, 1H);  $^{13}\text{C}$  NMR ( $\text{CD}_3\text{OD}$ )  $\delta$  22.4, 22.9, 25.4, 41.9, 53.3, 72.0, 101.9 (d,  $J$  = 27.4 Hz), 107.6 (d,  $J$  = 22.6 Hz), 122.9 (d,  $J$  = 2.4 Hz), 127.1 (d,  $J$  = 9.5 Hz), 129.1, 129.3, 129.7, 137.6, 153.8 (d,  $J$  = 9.5 Hz), 162.5 (d,  $J$  = 244.4 Hz), 169.5;  $^{19}\text{F}$  NMR ( $\text{CD}_3\text{OD}$ )  $\delta$  -119.0;  $[\alpha]_{\text{D}}^{26}$  +1.3 (c 4.39, MeOH); ESI-MS  $m/z$  331  $[\text{M}+\text{H}]^+$ ; HRMS (FAB) Anal. calcd. for  $\text{C}_{19}\text{H}_{23}\text{F}\text{N}_2\text{O}_2$   $m/z$  463.0798  $[\text{M}+\text{Cs}]^+$ , found 463.0815.

#### (S)-N-(4-Fluoro-2-hydroxyphenyl)-2-(3-hydroxybenzoylamino)-4-methylpentanamide (1n)

To a stirred solution of 3-acetoxybenzoyl chloride (prepared by 3-acetoxybenzoic acid (270 mg, 1.5 mmol) with oxalyl chloride (214  $\mu\text{L}$ , 2.5 mmol) and DMF (1 drop)) in  $\text{CH}_2\text{Cl}_2$  (5.0 mL) were added of **S5** (458 mg, 1.25 mmol) and  $\text{Et}_3\text{N}$  (522  $\mu\text{L}$ , 3.75 mmol) 0 °C. After stirring the resulting solution at room temperature for 20 min, the resulting mixture concentrated under reduced pressure. To the resulting residue were added MeOH (12 mL) and  $\text{K}_2\text{CO}_3$  (258 mg, 1.875 mmol) and the resulting suspension was stirred at room temperature for overnight. The reaction was quenched with 1N HCl aq. and extracted with ethyl acetate. The combined organic layers were washed with sat.  $\text{NaHCO}_3$  aq. and brine, then dried over  $\text{Na}_2\text{SO}_4$ . After filtration, volatiles were removed under reduced pressure and the resulting residue was dissolved in MeOH (12 mL) and stirred over Pd/C (70 mg, Merck 10 wt%) under hydrogen atmosphere at room temperature for 11 h. The resulting suspension was filtered through a pad of celite and the filtrate was concentrated under reduced pressure, and the residue was purified by silica gel column chromatography (ethyl acetate/*n*-hexane = 1/4 to 1/2) to give **1n** (445 mg, 98% yield, 3 steps) as a colorless solid as a colorless solid.

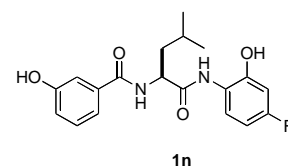

Colorless solid; IR (KBr)  $\nu$  3290, 1641, 1529  $\text{cm}^{-1}$ ; m.p. 72-73 °C;  $^1\text{H}$  NMR ( $\text{CD}_3\text{OD}$ )  $\delta$  1.00 (d,  $J$  = 5.8 Hz, 3H), 1.02 (d,  $J$  = 5.7 Hz, 3H), 1.74-1.88 (m, 3H), 4.78 (dd,  $J$  = 4.6, 9.8 Hz, 1H), 6.54 (ddd,  $J$  = 2.9, 8.6, 8.6 Hz, 1H), 6.59 (dd,  $J$  = 2.9, 10.3 Hz, 1H), 6.95-7.00 (m, 1H), 7.24-7.30 (m, 2H), 7.33 (d,  $J$  = 8.0 Hz, 1H), 7.78 (dd,  $J$  = 6.3, 9.2 Hz, 1H);  $^{13}\text{C}$  NMR ( $\text{CD}_3\text{OD}$ )  $\delta$  21.9, 23.5, 26.3, 41.5, 54.5, 103.7 (d,  $J$  = 25.0 Hz), 106.5 (d,  $J$  = 22.6 Hz), 115.5, 119.4, 119.9, 123.2 (d,  $J$  = 3.6 Hz), 124.2 (d,  $J$  = 9.5 Hz), 130.6, 136.6, 150.9 (d,  $J$  = 10.7 Hz), 158.8, 161.5 (d,  $J$  = 242.0 Hz), 170.8, 173.3;  $^{19}\text{F}$  NMR ( $\text{CD}_3\text{OD}$ )  $\delta$  -119.0;  $[\alpha]_{\text{D}}^{24}$  -7.8 (c 1.5, MeOH); ESI-MS  $m/z$  383  $[\text{M}+\text{Na}]^+$ ; HRMS (FAB) Anal. calcd. for  $\text{C}_{19}\text{H}_{21}\text{F}\text{N}_2\text{O}_4$   $m/z$  493.0540  $[\text{M}+\text{Cs}]^+$ , found 493.0550.

## 4. ICP Analysis of Nd/1m/Na and Sm/1m/Na Heterobimetallic Catalyst

### 4-1. ICP analysis of Nd/1m/Na catalyst.

#### Preparation of Nd standard solution.

1006 mg/L  $\text{Nd}(\text{NO}_3)_3$ /standard solution (for chemical analysis, in 1N  $\text{HNO}_3$  aq.) was diluted with 1N  $\text{HNO}_3$  aq. (spectroscopic grade) to give 2, 4, 6, 10 ppm standard solution.

#### Preparation of the catalyst sample

To a flame dried glass tube (inner diameter 5 mm, length 10 cm, capped with rubber septum) was added ligand **1m** (20.4 mg, 0.054 mmol) and dried under vacuum at room temperature for 10 min. To the test tube was back-filled Ar,



then THF (600  $\mu$ L) and  $\text{Nd}_5\text{O}(\text{O}^i\text{Pr})_{13}$  (135  $\mu$ L, 0.027 mmol, 0.2 M/THF (based on Nd), transferred by well-dried syringe and needle) were successively added at room temperature. After agitation of the resulting mixture with vortex mixer at the same temperature for 30 sec, the mixture was cooled to 0  $^{\circ}\text{C}$  and NaHMDS (54  $\mu$ L, 0.054 mmol, 1.0 M/THF, purchased from Aldrich and stored in pear-shaped flask with tight glass 3-way stopcock, transferred by well-dried syringe and needle) was added at the same temperature to give white suspension. After agitation of the resulting mixture with vortex mixer at room temperature for 30 sec, nitroethane (**3a**) (180  $\mu$ L), was added at the same temperature to give a clear solution. After standing at the same temperature, the white precipitates appeared and the whole suspension was transferred to Eppendorf safe-lock tube (size 1.5 mL). The tube was centrifuged (ca.  $10^4$  rpm, 30 sec). The supernatant was decanted to 30 mL flask and dry THF (1.0 mL) was added to the precipitate. The tube was agitated by vortex mixer for 30 sec and centrifuged again (washing process). The supernatant was decanted to the flask. The washing process was conducted twice and washings were combined, evaporated and well dried under vacuum and dissolved in 1N  $\text{HNO}_3$  aq. (final volume 50.0 mL) to give a supernatant sample. The precipitates were well dried under vacuum for 5 h and dissolved in 1N  $\text{HNO}_3$  aq. (final volume 50.0 mL) to give a precipitates sample.

Analytical curve was created by ICP analysis of standard Nd solutions. Nd and Na content of the catalyst (precipitates and supernatant samples) were determined with the analytical curve.

#### 4-2. ICP analysis of Sm/**1m**/Na catalyst.

##### *Preparation of Sm standard solution.*

1006 mg/L  $\text{Sm}(\text{NO}_3)_3$ /standard solution (for chemical analysis, in 1N  $\text{HNO}_3$  aq.) was diluted with 1N  $\text{HNO}_3$  aq. (spectroscopic grade) to give 2, 4, 6, 10 ppm standard solution.

##### *Preparation of the catalyst sample*

To a flame dried glass tube (inner diameter 5 mm, length 10 cm, capped with rubber septum) was added ligand **1m** (20.4 mg, 0.054 mmol) and dried under vacuum at room temperature for 10 min. To the test tube was back-filled Ar, then THF (600  $\mu$ L) and  $\text{Sm}_5\text{O}(\text{O}^i\text{Pr})_{13}$  (135  $\mu$ L, 0.027 mmol, 0.2 M/THF (based on Sm), transferred by well-dried syringe and needle) were successively added at room temperature. After agitation of the resulting mixture with vortex mixer at the same temperature for 30 sec, the mixture was cooled to 0  $^{\circ}\text{C}$  and NaHMDS (54  $\mu$ L, 0.054 mmol, 1.0 M/THF, purchased from Aldrich and stored in pear-shaped flask with tight glass 3-way stopcock, transferred by well-dried syringe and needle) was added at the same temperature to give white suspension. After agitation of the resulting mixture with vortex mixer at room temperature for 30 sec, nitroethane (**3a**) (180  $\mu$ L), was added at the same temperature to give a clear solution. After standing at the same temperature, the white precipitates appeared and the whole suspension was transferred to Eppendorf safe-lock tube (size 1.5 mL). The tube was centrifuged (ca.  $10^4$  rpm, 30 sec). The supernatant was decanted to 30 mL flask and dry THF (1.0 mL) was added to the precipitate. The tube was agitated by vortex mixer for 30 sec and centrifuged again (washing process). The supernatant was decanted to the flask. The washing process was conducted twice and washings were combined, evaporated and well dried under vacuum and dissolved in 1N  $\text{HNO}_3$  aq. (final volume 50.0 mL) to give a supernatant sample. The precipitates were well dried under vacuum for 5 h and dissolved in 1N  $\text{HNO}_3$  aq. (final volume 50.0 mL) to give a precipitates sample.

Analytical curve was created by ICP analysis of standard Nd solutions. Nd and Na content of the catalyst (precipitates and supernatant samples) were determined with the analytical curve.

### 5. XRF analysis of of Nd/**1m**/Na Heterobimetallic Catalyst

To a flame dried 100 mL flask was added ligand **1m** (1.5 g mg, 4.0 mmol) and dried under vacuum at room temperature for 10 min. To the test tube was back-filled Ar, then THF (20 mL) and  $\text{Nd}_5\text{O}(\text{O}^i\text{Pr})_{13}$  (10 mL, 2.0 mmol, 0.2 M/THF (based on Nd), transferred by well-dried syringe and needle) were successively added at room temperature. After stirring the resulting solution at the same temperature for 10 min, the mixture was cooled to 0  $^{\circ}\text{C}$  and NaHMDS (4.0 mL, 4.0 mmol, 1.0 M/THF, purchased from Aldrich and stored in pear-shaped flask with tight glass 3-way stopcock, transferred by well-dried syringe and needle) was added at the same temperature to give white suspension. After stirring the resulting mixture at room temperature for 10, nitroethane (**3a**) (8.5 mL), was added at the same temperature to give a clear solution. After standing at the same temperature, the white precipitates appeared and the whole suspension was transferred to two corning tubes (size 50 mL). The tubes were centrifuged (ca.  $10^3$  rpm, 5 min). The supernatant was decanted and dry THF (40 mL) was added to the resulting precipitates. The tube was agitated by vortex mixer for 30 sec and centrifuged again (washing process). The supernatant was decanted and the precipitates were collected and dried under vacuum to give heterogeneous catalyst sample 1.504 g for XRD analysis.

0.864 g of 1.504 g sample was taken and well grinded, then pressed to the sampler (40 kN). The sample was submitted to semi-quantitative (SQX) analysis conducted with a Rigaku ZSX Primus II WDXRF spectrometer. Mass% of F, Na, Nd was determined as 3.91, 4.23, and 16.2, respectively. These data corresponded that the 1.504 g of heterogeneous catalyst contained 1.69 mmol of Nd, 1.55 mmol of **1m**, and 2.77 mmol of Na.

## 6. ESI TOF MS Analysis of the Nd/**1m**/Na Heterobimetallic Catalyst

*Preparation of MS sample for  $\text{Nd}_5(\text{O}^i\text{Pr})_{13}/\mathbf{1m} = 1/2$  solution in THF (Figure 6(a))*

To a flame dried glass tube (inner diameter 5 mm, length 10 cm, capped with rubber septum) was added ligand **1m** (6.8 mg, 0.018 mmol) and dried under vacuum at room temperature for 10 min. To the test tube was back-filled Ar, then THF (200 mL) and  $\text{Nd}_5\text{O}(\text{O}^i\text{Pr})_{13}$  (45  $\mu\text{L}$ , 0.009 mmol, 0.2 M/THF (based on Nd), transferred by well-dried syringe and needle) were successively added at room temperature. After agitation of the resulting mixture with vortex mixer at the same temperature, the solution was diluted with THF (4.5 mL) to give the sample (final concentration 2 mM).

*Preparation of MS sample for  $\text{Nd}_5(\text{O}^i\text{Pr})_{13}/\mathbf{1m}/\text{NaHMDS} = 1/2/2$  solution in THF (Figure 6(b))*

To a flame dried glass tube (inner diameter 5 mm, length 10 cm, capped with rubber septum) was added ligand **1m** (6.8 mg, 0.018 mmol) and dried under vacuum at room temperature for 10 min. To the test tube was back-filled Ar, then THF (200 mL) and  $\text{Nd}_5\text{O}(\text{O}^i\text{Pr})_{13}$  (45  $\mu\text{L}$ , 0.009 mmol, 0.2 M/THF (based on Nd), transferred by well-dried syringe and needle) were successively added at room temperature. After agitation of the resulting mixture with vortex mixer at the same temperature for 30 sec, NaHMDS (18  $\mu\text{L}$ , 0.018 mmol, 1.0 M/THF, purchased from Aldrich and stored in pear-shaped flask with tight glass 3-way stopcock, transferred by well-dried syringe and needle) was added at the same temperature to give white suspension. After agitation of the resulting mixture with vortex mixer at room temperature for 30 sec, the suspension was diluted with THF (4.5 mL) to give the slightly cloudy sample solution (final concentration 2 mM). The sample was injected after filtration through 200  $\mu\text{m}$  mesh membrane filter.

The MS spectrum in negative ion detection mode was shown in Figure S1. Isotopic pattern of identified peaks is matched with those of theoretical pattern.

*Preparation of MS sample for  $\text{Nd}_5(\text{O}^i\text{Pr})_{13}/\mathbf{1m}/\text{NaHMDS} = 1/2/2$  solution in THF (Figure 6(c))*

To a flame dried glass tube (inner diameter 5 mm, length 10 cm, capped with rubber septum) was added ligand **1m** (6.8 mg, 0.018 mmol) and dried under vacuum at room temperature for 10 min. To the test tube was back-filled Ar, then THF (200 mL) and  $\text{Nd}_5\text{O}(\text{O}^i\text{Pr})_{13}$  (45  $\mu\text{L}$ , 0.009 mmol, 0.2 M/THF (based on Nd), transferred by well-dried syringe and needle) were successively added at room temperature. After agitation of the resulting mixture with vortex mixer at the same temperature for 30 sec, the mixture was cooled to 0  $^{\circ}\text{C}$  and NaHMDS (18  $\mu\text{L}$ , 0.018 mmol, 1.0 M/THF, purchased from Aldrich and stored in pear-shaped flask with tight glass 3-way stopcock, transferred by well-dried syringe and needle) was added at the same temperature to give white suspension. After agitation of the resulting mixture with vortex mixer at room temperature for 30 sec, nitroethane (**3a**) (60  $\mu\text{L}$ ), was added at the same temperature to give a clear solution. After standing at the same temperature, the white precipitates appeared and the whole suspension was transferred to Eppendorf safe-lock tube (size 1.5 mL). The tube was centrifuged (ca.  $10^4$  rpm, 30 sec). The supernatant was decanted and dry THF (1.0 mL) was added to the precipitates. The tube was agitated by vortex mixer for 30 sec and centrifuged again (washing process). The supernatant was decanted and the resulting precipitates were diluted with THF (9.0 mL) and DMSO (90  $\mu\text{L}$ ) to give clear solution (final concentration 1 mM). The sample was injected after filtration through 200  $\mu\text{m}$  mesh membrane filter.

The MS spectrum in negative ion detection mode was shown in Figure S2. Isotopic pattern of identified peaks is matched with those of theoretical pattern.

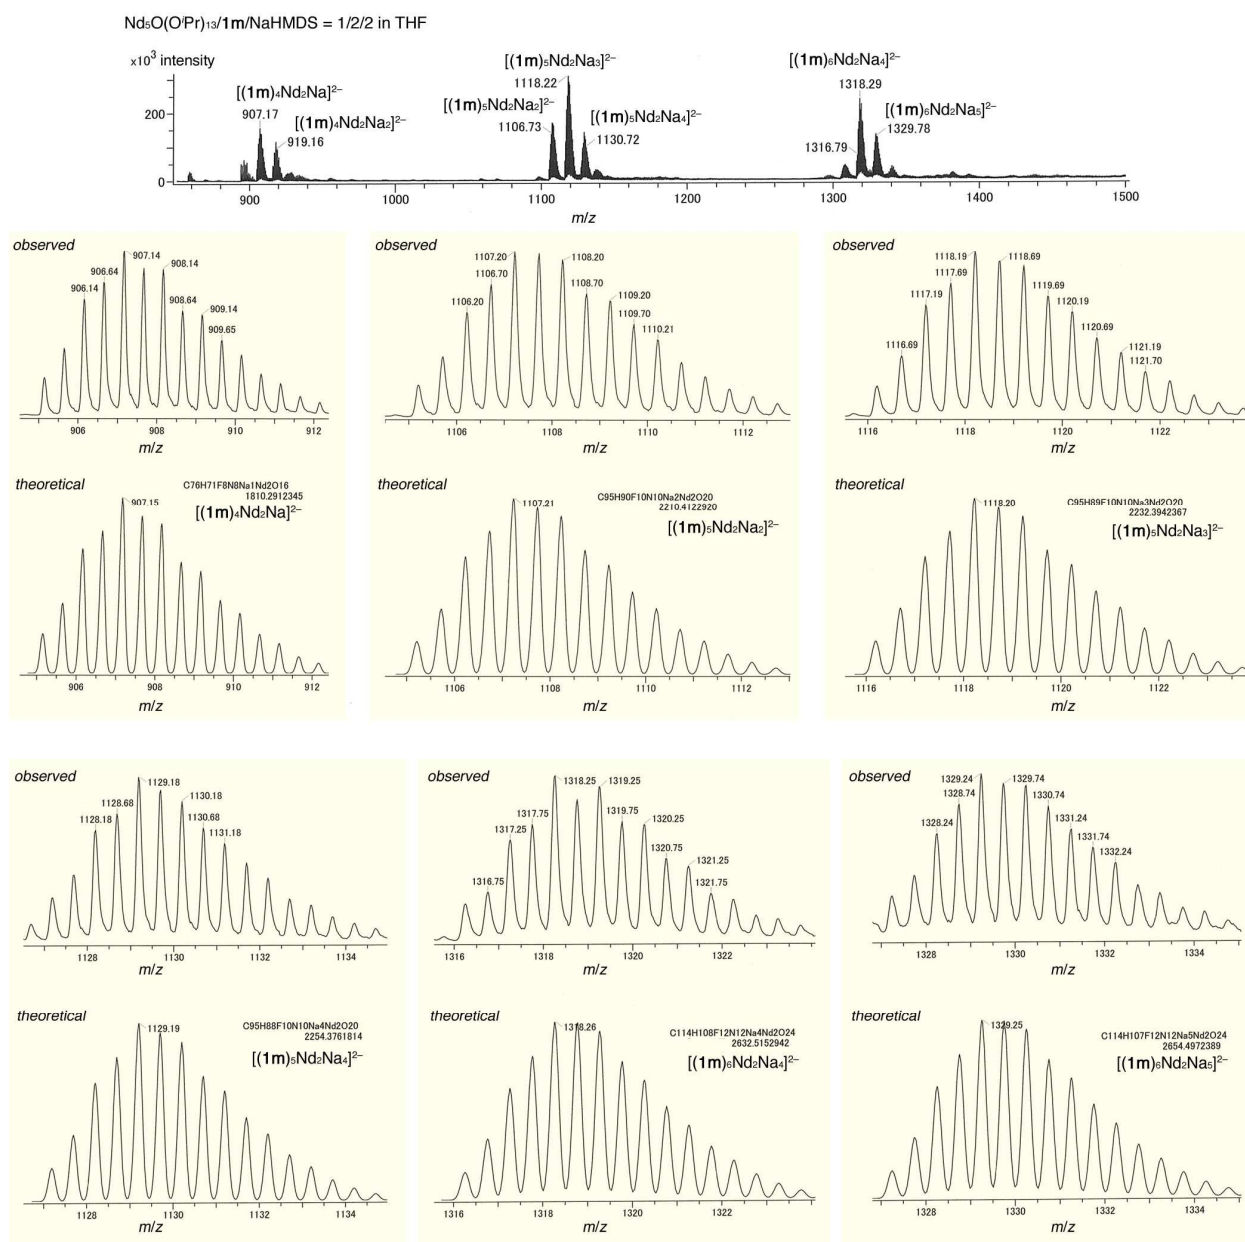

**Figure S1.** ESI TOF MS spectrum of  $\text{Nd}_5(\text{O}^i\text{Pr})_{13}/\mathbf{1m}/\text{NaHMDS} = 1/2/2$  solution.



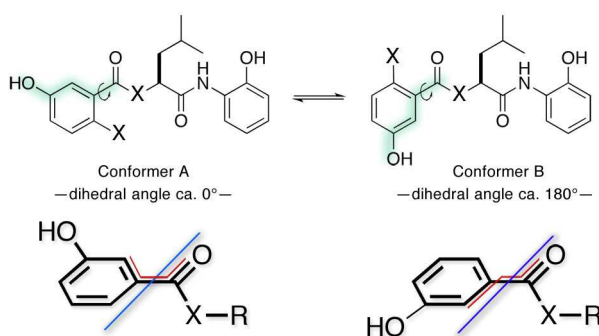

The conformation of each ligand was optimized by DFT calculation at B3LYP/6-311G(d,p)++ level of theory. As to the C-C single bond of bond between *m*-hydroxybenzoyl group and amide carbonyl, dihedral angle was ca. 0° in the optimized geometry in each ligand. Input geometry and optimized geometry was shown in the following.

#### Ligand **1g**—

Input geometry:

| atom | x             | y             | z             |
|------|---------------|---------------|---------------|
| C1   | -4.1353210000 | 1.0899740000  | 0.5363150000  |
| C2   | -4.3319330000 | 0.4820040000  | -0.7232710000 |
| C3   | -4.9098490000 | -0.8081090000 | -0.7844930000 |
| C4   | -5.3040860000 | -1.4662920000 | 0.3970970000  |
| C5   | -5.1173620000 | -0.8465500000 | 1.6474070000  |
| C6   | -4.5298260000 | 0.4317820000  | 1.7167760000  |
| H7   | -3.6819770000 | 2.0703470000  | 0.5936700000  |
| H10  | -5.7472020000 | -2.4512000000 | 0.3449650000  |
| H11  | -5.4244480000 | -1.3648030000 | 2.5454750000  |
| O11  | -4.3384060000 | 1.0383120000  | 2.9229510000  |
| C12  | -3.8885270000 | 1.1908410000  | -1.9694280000 |
| N13  | -3.3800900000 | 0.4104440000  | -2.9274850000 |
| O14  | -4.0420810000 | 2.4070780000  | -2.1008160000 |
| H15  | -3.3770890000 | -0.5841260000 | -2.7613920000 |
| C16  | -2.9626840000 | 0.8686070000  | -4.2522450000 |
| H18  | -2.4602630000 | 1.8341600000  | -4.1714820000 |
| C19  | -2.0131590000 | -0.1847170000 | -4.8743020000 |
| H20  | -2.5533300000 | -1.1274460000 | -4.9831860000 |
| H21  | -1.7557790000 | 0.1191710000  | -5.8909120000 |
| C22  | -0.7061660000 | -0.4436140000 | -4.0885290000 |
| H24  | -0.9611370000 | -0.7176520000 | -3.0637230000 |
| C25  | 0.0585600000  | -1.6328670000 | -4.6895620000 |
| H26  | -0.5509980000 | -2.5373990000 | -4.6883910000 |
| H27  | 0.3576010000  | -1.4362550000 | -5.7199130000 |
| H28  | 0.9620270000  | -1.8513940000 | -4.1188480000 |
| C28  | 0.2000950000  | 0.7975640000  | -4.0302090000 |
| H29  | 0.4575800000  | 1.1525030000  | -5.0288770000 |
| H30  | -0.2741340000 | 1.6199930000  | -3.4946830000 |
| H31  | 1.1324430000  | 0.5782540000  | -3.5084520000 |
| C31  | -4.1929840000 | 1.0103340000  | -5.1693630000 |
| N32  | -4.1154720000 | 1.9768590000  | -6.0957050000 |
| O33  | -5.1539310000 | 0.2470810000  | -5.0315780000 |
| H34  | -3.2623320000 | 2.5219950000  | -6.0991750000 |
| C35  | -6.7227830000 | 3.3862390000  | -9.1323430000 |
| C36  | -5.4611330000 | 3.9710710000  | -8.9140380000 |

|     |               |               |               |
|-----|---------------|---------------|---------------|
| C37 | -4.6220320000 | 3.4758400000  | -7.8963710000 |
| C38 | -5.0387670000 | 2.3939410000  | -7.0901850000 |
| C39 | -6.3093270000 | 1.8095310000  | -7.3148720000 |
| C40 | -7.1454490000 | 2.3069120000  | -8.3336740000 |
| H41 | -7.3666010000 | 3.7664420000  | -9.9135690000 |
| H42 | -5.1481510000 | 4.7994680000  | -9.5341520000 |
| O43 | -3.3954830000 | 4.0417080000  | -7.6824730000 |
| H44 | -6.6702040000 | 0.9813630000  | -6.7251740000 |
| H45 | -8.1147340000 | 1.8578260000  | -8.5019930000 |
| H46 | -4.6383680000 | 0.5112730000  | 3.6581030000  |
| H47 | -3.2137710000 | 4.7619250000  | -8.2780770000 |
| H48 | -5.0474230000 | -1.3067990000 | -1.7344230000 |

final geometry:

|      | angstroms     |               |                |
|------|---------------|---------------|----------------|
| atom | x             | y             | z              |
| C1   | -3.6005036032 | 0.5915892162  | 0.6424403757   |
| C2   | -4.1766280079 | 0.4061495604  | -0.6137000665  |
| C3   | -5.4096417120 | -0.2498967070 | -0.7266205808  |
| C4   | -6.0441444417 | -0.7233506980 | 0.4175274153   |
| C5   | -5.4626901097 | -0.5563332845 | 1.6720426978   |
| C6   | -4.2375228139 | 0.1048310096  | 1.7812490278   |
| H7   | -2.6604436397 | 1.1204349345  | 0.7295857524   |
| H10  | -7.0034724629 | -1.2210688011 | 0.3363784157   |
| H11  | -5.9621499681 | -0.9310964335 | 2.5605846638   |
| O11  | -3.6147957244 | 0.3069373779  | 2.9826666658   |
| C12  | -3.4282049125 | 0.9684972981  | -1.7948356793  |
| N13  | -3.6936506718 | 0.3906388695  | -3.0008928755  |
| O14  | -2.6123273282 | 1.8733107489  | -1.6641031564  |
| H15  | -4.4207990493 | -0.3050258921 | -3.0836195781  |
| C16  | -3.1973570570 | 0.9228781053  | -4.2581605273  |
| H18  | -2.7750037840 | 1.9057546018  | -4.0417168259  |
| C19  | -2.1258909885 | 0.0126847260  | -4.9054544161  |
| H20  | -2.5856605711 | -0.9670530748 | -5.0769492186  |
| H21  | -1.8760916762 | 0.4176330105  | -5.8943391455  |
| C22  | -0.8299828037 | -0.1628990142 | -4.0932318181  |
| H24  | -1.1084317447 | -0.4898564354 | -3.0850331833  |
| C25  | 0.0303656420  | -1.2668285668 | -4.7251657350  |
| H26  | -0.5095059358 | -2.2168946773 | -4.7773904203  |
| H27  | 0.3306509623  | -0.9966425119 | -5.7437373974  |
| H28  | 0.9422708078  | -1.4311903316 | -4.1444481476  |
| C28  | -0.0361233385 | 1.1443000811  | -3.9663550405  |
| H29  | 0.2325409079  | 1.5352357393  | -4.9549672917  |
| H30  | -0.5969071576 | 1.9083728273  | -3.4246106032  |
| H31  | 0.8937157608  | 0.9753738557  | -3.4159501206  |
| C31  | -4.3960070555 | 1.0441769042  | -5.2150113025  |
| N32  | -4.2879721098 | 2.0562275551  | -6.1260713129  |
| O33  | -5.3281680728 | 0.2560907303  | -5.1568178699  |
| H34  | -3.4883103832 | 2.6681997043  | -6.0393483033  |
| C35  | -6.7436100955 | 3.2171728751  | -9.3422459114  |
| C36  | -5.5729560494 | 3.9104601458  | -9.0338516959  |
| C37  | -4.7874791957 | 3.4993748215  | -7.9663684844  |
| C38  | -5.1556675279 | 2.3879549093  | -7.1859050978  |
| C39  | -6.3292881224 | 1.6998183400  | -7.5025680454  |
| C40  | -7.1147338691 | 2.1170194847  | -8.5771422108  |
| H41  | -7.3552894379 | 3.5411184503  | -10.1755832921 |
| H42  | -5.2696484905 | 4.7709826873  | -9.6225948593  |

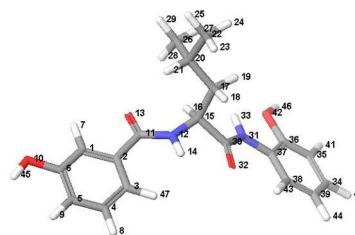

|     |               |               |               |
|-----|---------------|---------------|---------------|
| O43 | -3.6191492387 | 4.1304845987  | -7.6030816648 |
| H44 | -6.6137371429 | 0.8502508159  | -6.9015045890 |
| H45 | -8.0226738253 | 1.5738260576  | -8.8096838638 |
| H46 | -4.1486458867 | -0.0623392950 | 3.6938101673  |
| H47 | -3.4607838604 | 4.8906255244  | -8.1714398236 |
| H48 | -5.8992712183 | -0.3649900122 | -1.6860698486 |

2092.851610593 hartrees

Ligand **1h**—

Input geometry:

| angstroms |               |               |               |
|-----------|---------------|---------------|---------------|
| atom      | x             | y             | z             |
| C1        | -2.1956440000 | -0.0338340000 | -0.2937260000 |
| C2        | -2.1970620000 | 0.9776990000  | -1.2816970000 |
| C3        | -2.7277220000 | 0.6799650000  | -2.5641130000 |
| C4        | -3.2558950000 | -0.5980960000 | -2.8320610000 |
| C5        | -3.2571360000 | -1.5931150000 | -1.8371370000 |
| C6        | -2.7239950000 | -1.3094910000 | -0.5661130000 |
| H7        | -1.7862730000 | 0.1739170000  | 0.6852840000  |
| F8        | -2.7443720000 | 1.6063170000  | -3.5550880000 |
| H10       | -3.6612110000 | -0.8147510000 | -3.8096300000 |
| H11       | -3.6669090000 | -2.5674430000 | -2.0636180000 |
| O11       | -2.7141130000 | -2.2641490000 | 0.4066830000  |
| C12       | -1.6010020000 | 2.3186400000  | -0.9485430000 |
| N13       | -2.0307890000 | 3.3619360000  | -1.6657690000 |
| O14       | -0.8088530000 | 2.4432650000  | -0.0102940000 |
| H15       | -2.6926990000 | 3.1705850000  | -2.4045580000 |
| C16       | -1.6784260000 | 4.7606540000  | -1.4204410000 |
| H18       | -0.6191610000 | 4.8371910000  | -1.1692490000 |
| C19       | -1.9950200000 | 5.5923820000  | -2.6876310000 |
| H20       | -3.0635950000 | 5.5180920000  | -2.8996140000 |
| H21       | -1.8151200000 | 6.6491600000  | -2.4804280000 |
| C22       | -1.2023390000 | 5.1952420000  | -3.9548320000 |
| H24       | -1.3467280000 | 4.1295120000  | -4.1394830000 |
| C25       | -1.7451410000 | 5.9381310000  | -5.1851290000 |
| H26       | -2.8043370000 | 5.7281490000  | -5.3389670000 |
| H27       | -1.6330470000 | 7.0181680000  | -5.0817070000 |
| H28       | -1.2208330000 | 5.6361330000  | -6.0926240000 |
| C28       | 0.3077110000  | 5.4461870000  | -3.8055440000 |
| H29       | 0.5191340000  | 6.4911590000  | -3.5754580000 |
| H30       | 0.7433090000  | 4.8350440000  | -3.0151600000 |
| H31       | 0.8392610000  | 5.1975190000  | -4.7249130000 |
| C31       | -2.5164810000 | 5.3190290000  | -0.2537320000 |
| N32       | -1.9241910000 | 6.2733770000  | 0.4787990000  |
| O33       | -3.6618810000 | 4.8990500000  | -0.0615980000 |
| H34       | -0.9983250000 | 6.5533190000  | 0.1799680000  |
| C35       | -3.1120930000 | 8.5838730000  | 3.8334210000  |
| C36       | -1.9031700000 | 8.8345610000  | 3.1572590000  |
| C37       | -1.5410160000 | 8.0467300000  | 2.0467430000  |
| C38       | -2.3866240000 | 7.0065480000  | 1.6029070000  |
| C39       | -3.5986460000 | 6.7550150000  | 2.2912570000  |
| C40       | -3.9573780000 | 7.5444120000  | 3.4014630000  |
| H41       | -3.3895970000 | 9.1883820000  | 4.6859700000  |
| H42       | -1.2614050000 | 9.6338260000  | 3.5007790000  |
| O43       | -0.3652330000 | 8.2852900000  | 1.3902830000  |
| H44       | -4.2695610000 | 5.9634270000  | 1.9954980000  |



|     |               |               |              |
|-----|---------------|---------------|--------------|
| H45 | -4.8840240000 | 7.3496630000  | 3.9238720000 |
| H46 | -3.0928520000 | -3.0921520000 | 0.1249300000 |
| H47 | 0.1273900000  | 9.0070340000  | 1.7682850000 |

final geometry:

| atom | x             | y             | z             |
|------|---------------|---------------|---------------|
| C1   | -1.5097072121 | 0.6487746986  | -0.1753939232 |
| C2   | -2.1280533262 | 1.5192878096  | -1.0774496837 |
| C3   | -3.1400330232 | 0.9897140948  | -1.8821304816 |
| C4   | -3.5323403007 | -0.3334285149 | -1.8097000221 |
| C5   | -2.9028478392 | -1.1820941240 | -0.9040192253 |
| C6   | -1.8867807992 | -0.6871036899 | -0.0843538064 |
| H7   | -0.7231947310 | 1.0392017775  | 0.4568913732  |
| F8   | -3.7905517830 | 1.7810896555  | -2.7916627513 |
| H10  | -4.3227630029 | -0.6890424610 | -2.4581340635 |
| H11  | -3.2055306139 | -2.2222742161 | -0.8405679621 |
| O11  | -1.2250771919 | -1.4629497882 | 0.8269026495  |
| C12  | -1.6254461807 | 2.9434555562  | -1.0760942502 |
| N13  | -2.2252603629 | 3.8284162023  | -1.9086861797 |
| O14  | -0.6996778939 | 3.2708093083  | -0.3369776091 |
| H15  | -3.0202864724 | 3.5360523542  | -2.4557066190 |
| C16  | -1.7846471428 | 5.2210494334  | -2.0149387770 |
| H18  | -0.7213700063 | 5.2283010673  | -1.7693058372 |
| C19  | -2.0166054577 | 5.7546054600  | -3.4303508553 |
| H20  | -3.0932866139 | 5.7540358831  | -3.6278097186 |
| H21  | -1.7185705263 | 6.8082751951  | -3.4415983280 |
| C22  | -1.2752010996 | 5.0008587521  | -4.5507659371 |
| H24  | -1.5622204544 | 3.9432455738  | -4.5035067523 |
| C25  | -1.7176531150 | 5.5386525408  | -5.9187794705 |
| H26  | -2.7999817998 | 5.4518047961  | -6.0507451581 |
| H27  | -1.4528680990 | 6.5957727739  | -6.0284314343 |
| H28  | -1.2349939973 | 4.9890714499  | -6.7318309576 |
| C28  | 0.2512451324  | 5.0772433182  | -4.4045894787 |
| H29  | 0.5923769201  | 6.1184300344  | -4.4168350596 |
| H30  | 0.6031633662  | 4.6194802163  | -3.4765740547 |
| H31  | 0.7450330385  | 4.5577074793  | -5.2306437448 |
| C31  | -2.5317958601 | 6.0810217962  | -0.9609583069 |
| N32  | -2.0368594997 | 5.9237073107  | 0.3055990495  |
| O33  | -3.4731208839 | 6.7956099688  | -1.2614361247 |
| H34  | -1.2761761905 | 5.2573535816  | 0.4159399335  |
| C35  | -3.3272742834 | 7.5199206173  | 3.9865536978  |
| C36  | -2.1713651051 | 6.7451064508  | 3.8950341431  |
| C37  | -1.7682595552 | 6.2398850983  | 2.6660875815  |
| C38  | -2.5171705104 | 6.4952025705  | 1.5005725530  |
| C39  | -3.6706984409 | 7.2786433596  | 1.6035197801  |
| C40  | -4.0689019302 | 7.7849081157  | 2.8409643935  |
| H41  | -3.6369273864 | 7.9121186075  | 4.9477801959  |
| H42  | -1.5766689091 | 6.5350401854  | 4.7789759832  |
| O43  | -0.6381223459 | 5.4782464872  | 2.5036447905  |
| H44  | -4.2411842105 | 7.4833535762  | 0.7111541571  |
| H45  | -4.9665627942 | 8.3886683779  | 2.9000528113  |
| H46  | -1.5682870119 | -2.3622037321 | 0.8078318318  |
| H47  | -0.2465781353 | 5.2771497319  | 3.3590479248  |

2312.810924585 hartrees

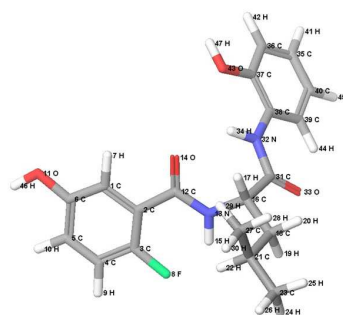



Ester analog—  
Input geometry:

|      | angstroms     |               |               |
|------|---------------|---------------|---------------|
| atom | x             | y             | z             |
| C1   | -3.0514090000 | -0.0750770000 | 2.3447460000  |
| C2   | -3.8358280000 | 0.6064140000  | 1.3829380000  |
| C3   | -4.7337610000 | -0.1506030000 | 0.5807290000  |
| C4   | -4.8329240000 | -1.5454880000 | 0.7540180000  |
| C5   | -4.0486610000 | -2.2069730000 | 1.7159960000  |
| C6   | -3.1557970000 | -1.4681350000 | 2.5123930000  |
| H7   | -2.3597580000 | 0.4753770000  | 2.9675390000  |
| F8   | -5.5108090000 | 0.4226790000  | -0.3713290000 |
| H10  | -5.5168670000 | -2.1117430000 | 0.1385430000  |
| H11  | -4.1414660000 | -3.2779260000 | 1.8301420000  |
| O11  | -2.3871880000 | -2.0928630000 | 3.4487260000  |
| C12  | -3.6639860000 | 2.0871900000  | 1.2713730000  |
| O13  | -4.4478450000 | 2.6627400000  | 0.3325220000  |
| O14  | -2.8766700000 | 2.7293230000  | 1.9745530000  |
| C16  | -4.4515290000 | 4.0762380000  | 0.1140470000  |
| H18  | -3.4184460000 | 4.4175360000  | 0.0230150000  |
| C19  | -5.1826510000 | 4.3224030000  | -1.2268080000 |
| H20  | -4.7086330000 | 3.7156480000  | -1.9993110000 |
| H21  | -6.1996720000 | 3.9363770000  | -1.1378450000 |
| C22  | -5.2448760000 | 5.7915090000  | -1.7112620000 |
| H24  | -5.7212840000 | 6.3973260000  | -0.9387280000 |
| C25  | -3.8517840000 | 6.3852080000  | -1.9817810000 |
| H26  | -3.9267490000 | 7.4005210000  | -2.3730170000 |
| H27  | -3.2502050000 | 6.4434970000  | -1.0748520000 |
| H28  | -3.2989900000 | 5.7922310000  | -2.7113350000 |
| C28  | -6.1234450000 | 5.9061910000  | -2.9666880000 |
| H29  | -5.7102360000 | 5.3330830000  | -3.7977650000 |
| H30  | -7.1324520000 | 5.5369080000  | -2.7790110000 |
| H31  | -6.2152380000 | 6.9430590000  | -3.2928030000 |
| C31  | -5.1423650000 | 4.7890810000  | 1.2971100000  |
| N32  | -4.4551400000 | 5.7971400000  | 1.8546820000  |
| O33  | -6.2527370000 | 4.4059010000  | 1.6766890000  |
| H34  | -3.5736040000 | 6.0320920000  | 1.4160170000  |
| C35  | -5.2921500000 | 8.5399360000  | 4.9795650000  |
| C36  | -4.2126460000 | 8.7367530000  | 4.0975150000  |
| C37  | -3.9642460000 | 7.8050350000  | 3.0703790000  |
| C38  | -4.7972700000 | 6.6758860000  | 2.9145050000  |
| C39  | -5.8761900000 | 6.4779830000  | 3.8099790000  |
| C40  | -6.1208300000 | 7.4105640000  | 4.8369900000  |
| H41  | -5.4816850000 | 9.2541640000  | 5.7688970000  |
| H42  | -3.5815140000 | 9.6058540000  | 4.2198680000  |
| O43  | -2.9131530000 | 7.9888160000  | 2.2152730000  |
| H44  | -6.5253930000 | 5.6189480000  | 3.7385910000  |
| H45  | -6.9458370000 | 7.2567080000  | 5.5190900000  |
| H46  | -2.5300060000 | -3.0345290000 | 3.4851780000  |
| H47  | -2.4189920000 | 8.7805180000  | 2.4040680000  |

final geometry:

|      | angstroms     |               |              |
|------|---------------|---------------|--------------|
| atom | x             | y             | z            |
| C1   | -3.0048080709 | 0.2169627682  | 2.3290560138 |
| C2   | -3.7891876906 | 0.7385008320  | 1.2911303878 |
| C3   | -4.6169914976 | -0.1435428398 | 0.5852976509 |

|     |               |               |               |
|-----|---------------|---------------|---------------|
| C4  | -4.6767570392 | -1.4914499341 | 0.9135903467  |
| C5  | -3.9017620583 | -1.9883910873 | 1.9582969128  |
| C6  | -3.0575491886 | -1.1311642008 | 2.6673544677  |
| H7  | -2.3533753759 | 0.8857295370  | 2.8754184276  |
| F8  | -5.3724945890 | 0.2742848204  | -0.4515099020 |
| H10 | -5.3309014891 | -2.1400793728 | 0.3445722044  |
| H11 | -3.9552617978 | -3.0419451885 | 2.2149806893  |
| O11 | -2.2642875095 | -1.5540557576 | 3.7011437259  |
| C12 | -3.6652456270 | 2.2101113124  | 1.0511625164  |
| O13 | -4.5878722588 | 2.6953924612  | 0.2059821573  |
| O14 | -2.8114102774 | 2.8949538781  | 1.5744247643  |
| C16 | -4.5469476738 | 4.1244880145  | -0.0149075925 |
| H18 | -3.5000293520 | 4.4160854751  | -0.1072275090 |
| C19 | -5.3399259120 | 4.3616843646  | -1.3029670620 |
| H20 | -4.9131691955 | 3.7180185088  | -2.0798961617 |
| H21 | -6.3611615141 | 4.0156277658  | -1.1231069613 |
| C22 | -5.3686798648 | 5.8239563055  | -1.7933367204 |
| H24 | -5.7413281434 | 6.4559786980  | -0.9776315707 |
| C25 | -3.9786866412 | 6.3393970234  | -2.1919677062 |
| H26 | -4.0377555047 | 7.3696285961  | -2.5540288517 |
| H27 | -3.2728264575 | 6.3296793742  | -1.3565013611 |
| H28 | -3.5553184771 | 5.7283097890  | -2.9963743925 |
| C28 | -6.3512459223 | 5.9608719592  | -2.9663952317 |
| H29 | -6.0368699396 | 5.3416441234  | -3.8138276896 |
| H30 | -7.3582411652 | 5.6479143544  | -2.6779053149 |
| H31 | -6.4070539256 | 6.9965234191  | -3.3148347174 |
| C31 | -5.2369959137 | 4.8270733478  | 1.1712710095  |
| N32 | -4.4340789491 | 5.7025365395  | 1.8477386875  |
| O33 | -6.4055215979 | 4.6058659352  | 1.4311841157  |
| H34 | -3.4448638327 | 5.6614551211  | 1.6420861111  |
| C35 | -5.2720675119 | 8.3365484353  | 5.0271762834  |
| C36 | -3.9807799705 | 8.2071120271  | 4.5107801468  |
| C37 | -3.7384206436 | 7.3245413191  | 3.4660663856  |
| C38 | -4.7804754068 | 6.5474643930  | 2.9208283998  |
| C39 | -6.0696248972 | 6.6860308115  | 3.4445588947  |
| C40 | -6.3079150050 | 7.5782425748  | 4.4906649221  |
| H41 | -5.4579747483 | 9.0269756125  | 5.8415404493  |
| H42 | -3.1625863361 | 8.7956122064  | 4.9162072253  |
| O43 | -2.4937238770 | 7.1457470022  | 2.9046573028  |
| H44 | -6.8703632287 | 6.0990522431  | 3.0225986963  |
| H45 | -7.3129784566 | 7.6732845019  | 4.8841040620  |
| H46 | -2.3933679416 | -2.4957664794 | 3.8548708186  |
| H47 | -1.8274460954 | 7.6107268648  | 3.4207967495  |

2302.088190184 hartrees

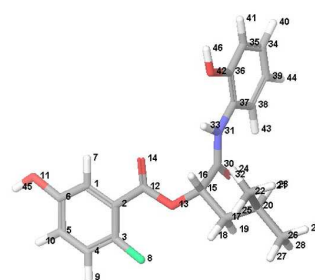

Coordination scan of dihedral angle between *m*-hydroxybenzoyl plane and carbonyl plane (step: 10 degree) was performed on these three ligands at B3LYP/6-311G(d,p)+ level of theory. The obtained energy profiles were shown in Figure S3. In contrast to ligand **1g**, ligand **1h** bearing *o*-fluoro substituent exhibited strong preferences for the conformer A (dihedral angle ca. 20°). This is not the case with the ester analog bearing *o*-fluoro substituent, suggesting that the observed preference in ligand **1h** is mainly due to hydrogen bonding interaction between C-F...H-N. Electrostatic repulsion between fluoro substituent and carbonyl oxygen would not be a primary cause.

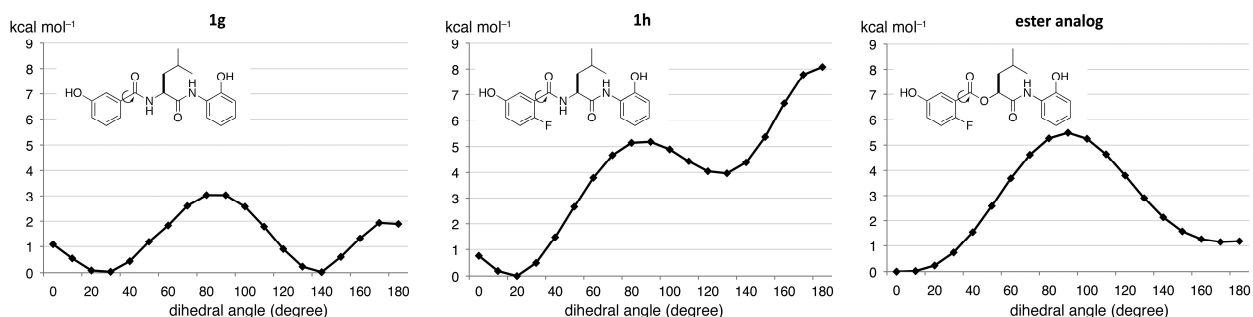

**Figure S3.** Energy profile of rotational conformers of **1g**, **1h**, and ester analog.

## 8. Storage of the Heterogeneous Heterobimetallic Catalyst

The heterogeneous catalyst was prepared in the same procedure as described in the section 2-3, and the catalyst in the eppendorf tube (washed THF was decanted, not dried) was stored under Ar atmosphere at  $-20\text{ }^{\circ}\text{C}$ . The reaction was performed after aging for the specified period. The eppendorf tube was warmed up to room temperature and used as catalyst.

## 9. References

- s1 Mashiko, T.; Hara, K.; Tanaka, D.; Fujiwara, Y.; Kumagai, N.; Shibasaki, M. *J. Am. Chem. Soc.* **2007**, *129*, 11342.
- s2 Bridges, A. J.; Lee, A.; Maduakor, E. C.; Schwartz, C. E. *Tetrahedron Lett.* **1992**, *33*, 7495.
- s3 Marzi, E.; Gorecka, J.; Schlosser, M. *Synthesis* **2004**, 1609.
- s4 B3LYP = Becke-3-Lee-Yang-Parr density functional theory. (a) Becke, A. D. *J. Chem. Phys.* **1993**, *98*, 1372. (b) Lee, C.; Yang, W.; Parr, R. G. *Phys. Rev. B* **1988**, *37*, 785.
- s5 (a) Krishnan, R.; Binkley, J. S.; Seeger, R.; Pople, J. A. *J. Chem. Phys.* **1980**, *72*, 650. (b) McLean, A. D.; Chandler, G. S. *J. Chem. Phys.* **1980**, *72*, 5639. (c) Clark, T.; Chandrasekhar, J.; Spitznagel, G. W.; Ragué Schleyer, P. J. *Comput. Chem.* **1983**, *4*, 294. (d) Frisch, M. J.; Pople, J. A.; Binkley, J. S. *J. Chem. Phys.* **1984**, *80*, 3265.
